## Cdx4 regulates the onset of spinal cord neurogenesis

Piyush Joshi<sup>1</sup>, Andrew J. Darr<sup>2,3</sup>, and Isaac Skromne<sup>1,4\*</sup>

<sup>1</sup>Department of Biology, University of Miami, 1301 Memorial Drive, Coral Gables, Florida, 33146, United States

<sup>2</sup>The Miami Project to Cure Paralysis, 1095 NW 14<sup>th</sup> Terrace R501, Miami, Florida, 33136, United States

<sup>3</sup>Department of Neurological Surgery, University of Miami Miller School of Medicine, University of Miami 1095 NW 14<sup>th</sup> Terrace R501, Miami, Florida, 33136, United States

<sup>4</sup>Current Address: Department of Biology, University of Richmond, 28 Westhampton Way B322, Richmond, Virginia, 23173, United States

**\*Corresponding author:** (I.S.) Tel.: +1-804-829-8235; Fax: +1-804-289-8871; E-mail:

[iskromne@richmond.edu](mailto:iskromne@richmond.edu)

**Keywords:** spinal cord, neurogenesis, Cdx, FGF, Wnt, Retinoic Acid, Pax6 (six indexing words)

**Running title:** Cdx in spinal cord neurogenesis (40 characters)

## ABSTRACT

The transition of cells from one developmental state to the next is driven by signaling cues interpreted by intracellular networks of transcription factors. In the vertebrate spinal cord, the progressive caudal-to-rostral maturation of cells is controlled by the signaling activities of FGF/Wnt antagonizing Retinoic Acid (RA): FGF/Wnt secreted from the caudal stem zone promote stem cell identities, whereas RA secreted from the somites promotes neural differentiation. It is unclear how intracellular transcription factor networks interpret these extracellular signaling cues. Using transient gene manipulation techniques in chicken, we show that *Cdx4* is at the core of the transcription factor network that integrates upstream signaling information to regulate the sequential maturation of spinal cord neural progenitor cells. We show that *Cdx4* represses the stem cell marker *Sax1* and promotes expression of the neural identity gene *Pax6* while simultaneously preventing the activation of the Pax6-dependent, neural-differentiation gene *Ngn2*. Our results suggest a novel role for *Cdx4* in regulating the sequential maturation of neural cell states during early spinal cord development. Given *Cdx* factors established role in the transcriptional regulation of *Hox* patterning genes, we propose that *Cdx* factors coordinate the axial specification and maturation of cells during spinal cord development.

## INTRODUCTION

Cells transit from one temporary state to another during their gradual differentiation towards acquiring specialized functions. At each step of their differentiation path, the next state is specified by the regulatory state of the cell, as defined by the totality of active transcription factors (Davidson, 2006; Royo et al., 2011). During this gradual process, the cell's transcription factor composition also transits from one state to another, mostly cued by dynamic extra-cellular signaling factors (Peter and Davidson, 2013; Sandmann et al., 2007). It is the cross-regulation between transcription and signaling components that promote the progressive acquisition of specialized functions while preventing dedifferentiation: transcription factors specify the cell's identity and ability to respond to signaling factors (competence), and signaling factors control the temporal activity of transcription factors to promote directional acquisition of specialized traits (Davidson and Levine, 2008; Levine and Davidson, 2005; Sandmann et al., 2007). These interactions between transcription factors and signaling pathways form complex networks that have been challenging to dissect, hindering our understanding of the mechanisms regulating cellular state transitions.

Vertebrate spinal cord serves as an important accessible system to study the transition of cellular states during neural differentiation due to its characteristic head to tail development (Diez del Corral and Storey, 2004). The progressively differentiated cells are arranged in caudal-to-rostral direction in a configuration mirroring their temporal progression in differentiation: cells born earlier in development are more advanced in the differentiation program and localize to more rostral regions than the later born, more immature cells in caudal regions (Butler and Bronner, 2015; Diez del Corral et al., 2003; Diez del Corral and Storey, 2004; Wilson et al., 2009). In chicken and mouse embryos, four distinct regions containing cells at different states of

differentiation can be identified rostro-caudally based on the expression of marker genes (Fig. 1A). At the caudal most end, regions in the stem zone act as reservoir of bipotent neuromesodermal progenitors (NMPs; Henrique et al., 2015). In the early embryos, NMPs are located in the caudal lateral epiblast (CLE) and the node-streak border (NSB) regions that surrounds the primitive streak (Brown and Storey, 2000; Cambray and Wilson, 2007; Henrique et al., 2015). At later stages, the caudal neural hinge (CNH) region (derivative of CLE and NSB) in the tail bud is the source of the NMPs (Cambray and Wilson, 2007). NMPs located in the CLE and NSB regions are defined molecularly by the expression of the genes *T (Bra)*, *Sox2* and *Sax1 (Nkx1.2)* (Delfino-Machin et al., 2005), and have been shown by fate mapping studies to contribute not only to the neural tube, but also to the pre-somitic mesoderm (Brown and Storey, 2000; Cambray and Wilson, 2007; Tzouanacou et al., 2009). Immediately rostral to the NMP domain is the transition zone, that can be divided into caudal and rostral regions. While in the caudal transition zone cells begin to downregulate *T (Bra)* (Delfino-Machin et al., 2005), it is only until the cells migrate into the rostral transition zone that they down regulate *Sax1* and begin to express neural identity markers *Pax6* and *Irx3* (Bertrand et al., 2000; Delfino-Machin et al., 2005; Diez del Corral et al., 2003). Cells begin their further maturation in the neural tube that is surrounded by somites, and begin to express the neural differentiation genes *Ngn1/2* and *NeuroM* (Diez del Corral et al., 2003). Thus, temporally distinct steps in the maturation and differentiation of cells within the spinal cord cells can be spatially distinguished by the combinatorial transcription of pluripotency and differentiation factors.

The spatio-temporal gradient of neural differentiation states in the spinal cord is generated and maintained by opposing gradients of the signaling factors FGF/Wnt, and retinoic acid (RA) (Diez del Corral et al., 2003; Olivera-Martinez and Storey, 2007). FGF8 and Wnts

(Wnt3a and Wnt8c) establish a caudal to dorsal gradient that promote pluripotency by directly promoting *T (Bra)*, *Sox2* and *Sax1*; and preventing *Pax6* and *Irx3* transcription (Bertrand et al., 2000; Delfino-Machin et al., 2005; Diez del Corral et al., 2003; Olivera-Martinez et al., 2012). In contrast, RA secreted from somites establishes a rostral to caudal signaling gradient that promotes differentiation by inducing cells to exit the proliferation program, first by promoting transcription of neural identity genes *Pax6* and *Irx3* (Diez del Corral et al., 2003; Novitch et al., 2003; Pituello et al., 1999), and then promoting transcription of downstream neurogenic genes *Ngn1/2* and *NeuroM* (Diez del Corral et al., 2003). Opposing signaling activities of FGF/Wnt and RA are respectively segregated to caudal and rostral regions of the nascent spinal cord through positive and negative interactions: FGF indirectly promotes differentiation by inducing RA production rostrally, through a Wnt8c-mediated mechanism (Olivera-Martinez and Storey, 2007), while FGF also maintains RA production away from the pluripotency zone by directly inhibiting RA synthesis (Olivera-Martinez et al., 2012) and promoting RA degradation caudally (Boulet and Capecchi, 2012; Sakai et al., 2001; White et al., 2007). RA, in turn, inhibits *Fgf8* transcription rostrally, creating a zone where cells exit the cell cycle and differentiate (Diez del Corral et al., 2003; Kumar and Duester, 2014). These interactions have been proposed to function as the signaling switch that drives the transition of cellular states in the caudal neural tube (Diez del Corral and Storey, 2004; Olivera-Martinez and Storey, 2007). While the signaling aspect of the differentiation switch have been extensively investigated, the underlying transcription factor network driving the cell transition states in the nascent spinal cord is poorly understood.

In the NMP domain and the transition zone, *Cdx* stands out as a transcription factor family that is under the simultaneous control of FGF, Wnt and RA signals (Deschamps and van

Nes, 2005; Lohnes, 2003). Cdx factors have been extensively characterized and shown to be necessary for the development of several embryonic tissues including trophoderm (Sritanandomchai et al., 2009; Strumpf et al., 2005), post-occipital tissues (van Rooijen et al., 2012), intestinal cell (Beck et al., 1999; Flores et al., 2008) and hematopoiesis (Davidson et al., 2003; Wang et al., 2008). In the spinal cord, Cdx factors are essential for tissue specification and rostrocaudal patterning (Deschamps et al., 1999; Nordstrom et al., 2006; Shimizu et al., 2006; Skromne et al., 2007; van den Akker et al., 2002), controlling the initiation, establishment and maintenance of *Hox* gene transcription domains (Deschamps et al., 1999; Hayward et al., 2015). Thus, members of the Cdx family are attractive candidates to integrate FGF, Wnt and RA signals in the caudal neural plate and regulate spinal cord neurogenesis.

Here we show that Cdx4, one of three members of Cdx family, regulates the temporal progression of cellular states in the developing chicken caudal neural tube. Using transient gene expression strategies, we show that Cdx4 regulates the expression of several genes involved in the sequential differentiation of neural precursors, including *Sax1*, *Pax6* and *Ngn2*. Our results show that Cdx4 acts as a dual control switch during neurogenesis, inhibiting pluripotency in NMPs while promoting acquisition of neural identity. Furthermore, we show that timely downregulation of Cdx4 is needed for further neuronal cell differentiation. Our results support a novel role for Cdx factors in regulating the onset and progression of caudal neural tube neurogenesis.

## **RESULTS**

### ***Cdx4* dorso-ventral gradient of transcription in the caudal neural tube does not specify dorso-ventral cell identities**

*Cdx4* neural function was first analyzed by correlating its transcription domain to distinct progenitor cell maturation zones of the caudal neural plate (Fig. 1A; Olivera-Martinez and Storey, 2007). As previously reported (Morales et al., 1996), in whole embryos, *Cdx4* is transcribed in the neural plate and nascent neural tube in a high caudal to low rostral gradient (Fig. 1B). Upon sectioning, however, it was also revealed that *Cdx4* is transcribed in a highly dynamic dorso-ventral (DV) gradient: caudally, *Cdx4* transcription was ubiquitous throughout the medio-lateral extent of the neural plate (dorso-ventral extent after neural plate closure post HH13), whereas rostrally, *Cdx4* transcription was progressively excluded from ventral regions and the roof plate (Fig. 1B, transverse sections). A similar dorsally restricted transcription profile has been reported for *Cdx4* in mice (Gaunt et al., 2005), suggesting evolutionary conserved gene regulatory mechanisms, and a potential function for *Cdx4* in the specification of DV neural cell identities.

To test the role of *Cdx4* in DV specification, we analyzed *Cdx4* transcriptional domain relative to that of the known DV markers *Pax7* (dorsal) (Briscoe et al., 2000; Diez del Corral et al., 2003), *Pax6* (dorsal-to-intermediate) (Briscoe et al., 2000; Novitch et al., 2003), and *Nkx6.1* (ventral) (Briscoe et al., 2000; Diez del Corral et al., 2003; Novitch et al., 2001). We did not observe any clear correspondence between the transcriptional domain of *Cdx4* and any of these markers. For example, in the caudal transition zone, *Pax7* domain was nested within, and *Nkx6.1* domain was complementary to the *Cdx4* transcription domain (Fig. 1B, C). However, in the rostral transition zone and neural tube, *Pax7* domain was broader than, and *Nkx6.1* domain no longer complemented the *Cdx4* transcription domain (Fig. 1B, C). Similar lack of correlation was also observed between *Cdx4* and *Pax6* domains (Fig. 1B, C).

To formally test *Cdx4* involvement in DV cell fate specification, we artificially maintained high levels of *Cdx4* in the neural tube at times when *Cdx4* would normally be down regulated. We predicted that if *Cdx4* regulates DV cell specification, increasing *Cdx4* levels would result in change in the localization of DV marker genes. We overexpressed wild type *Cdx4* by electroporating the neural tube of stage HH10-11 embryos, and analyzed the protein distribution of Pax7, Pax6, and Nkx6.1 24-hours post-electroporation (hpe; HH16-17). While high levels of *Cdx4* expression did not change Nkx6.1 and Pax7 protein distribution (Fig. 1D; n=6/6 for both conditions), ectopic Pax6 protein was detected both ventrally and dorsally outside its normal domain (Fig. 1D; n=6/6). Together, these results suggest that *Cdx4* is not involved in the general specification of DV neural identities, but in the specific regulation of *Pax6* (Fig. 1E)

### ***Cdx4* regulates *Pax6* transcription during neural progenitor cell maturation**

In addition to its function in DV cell specification, Pax6 promotes the maturation of neural progenitor cells in the nascent neural tube (Bel-Vialar et al., 2007). Given that our results do not support a function for *Cdx4* in DV cell specification (Fig. 1), we hypothesized that *Cdx4* might regulate *Pax6* transcription during neural progenitor cell maturation. To test this hypothesis we asked whether the presence of *Cdx4* was sufficient to activate *Pax6* in the nascent neural tube, in a region where *Pax6* is not yet transcribed. Embryos were electroporated in the transition zone with different *Cdx4* constructs, grown for 8 hours only, and analyzed for premature *Pax6* activation by *in situ* hybridization. Two constructs were used in this assay, a wild type and a constitutive active version of *Cdx4* that faithfully recapitulates *Cdx* functions in *Hox* gene regulation assays (VP16*Cdx4*; Bel-Vialar et al., 2002; Faas and Isaacs, 2009). Overexpression of VP16*Cdx4*, but not wild type *Cdx4*, resulted in the premature, high-level activation of *Pax6*



transcription (Fig. 2A; n=4/6 by ISH. Fig. 2B; n=3/4 by IHC). Several explanations could account for the lack wild type Cdx4 activity on *Pax6* including the requirement for additional co-factors or its inability to overcome the presence of repressors. VP16Cdx4 was able to overcome these hurdles, suggesting that, under the right conditions, activated Cdx4 induces *Pax6* transcription during neural progenitor cell maturation.

To test if Cdx4 activation is necessary in the transition zone for *Pax6* activation, we outcompeted endogenous Cdx4 by overexpressing a dominant negative form of Cdx4 in which the transcription activation domain of the protein was replaced with the transcriptional repressor domain of the *Drosophila* Engrailed protein (Han and Manley, 1993). This chimeric form of Cdx4 has been shown to repress transcription of Cdx downstream targets (e.g., *Hox* genes; Bel-Vialar et al., 2002; Isaacs et al., 1998). Overexpression of *EnRCdx4* resulted in loss of *Pax6* in the transition zone as early as 8 hpe (Fig. 2Ac; n=6/6), indicating that Cdx4 indeed regulates *Pax6* transcription. However, when interpreted together with the results of the gain of function experiments, these results also suggest that Cdx4 activation of *Pax6* transcription requires a permissive state.

### **Cdx4 activation of *Pax6* is dependent on retinoic acid (RA) signaling**

Somite-derived RA regulates spinal cord neurogenesis by activating numerous target genes in the rostral transition zone, including *Pax6* (Novitch et al., 2003; Pituello et al., 1999). Given that RA and Cdx4 interact during zebrafish spinal cord cell specification (Chang et al., 2016; Lee and Skromne, 2014), we hypothesized that RA and Cdx4 might also interact during spinal cord cell maturation. To test this hypothesis we analyzed the transcription of *Pax6* in wild type and RA-deficient embryos 24 hpe, at a time when electroporated cells would be undergoing maturation.

As previously shown (Novitch et al., 2003), overexpression of a dominant negative RA receptor (dnRAR) blocked RA signaling and caused *Pax6* down regulation (Fig. 2Cd, D). In these RA-deficient embryos, *Cdx4* was unable to promote *Pax6* transcription (n=6/6; Fig. 2Ce, D), despite that in a wild type embryos *Cdx4* was able to do so (n=6/6; Fig. 1D; Fig. 2Ca, D). Significantly, however, *VP16Cdx4* was able to induce *Pax6* transcription even in the absence of RA (n=6/6; Fig. 2Cb, Cf, D). Together, these results suggest that RA is required for the *Cdx4*-dependent activation of *Pax6*, and illuminates a mechanism for the restricted transcription of *Pax6* to the rostral portion of the transition zone and the caudal neural tube (Fig. 2E).

### ***Cdx4* promotes early differentiation states by simultaneously inhibiting cell proliferation and late differentiation programs**

Despite *Pax6* being present in both the transition zone and the neural tube, *Pax6* only activates neural differentiation genes in the neural tube (Bel-Vialar et al., 2007). What prevents *Pax6* premature activation of neural differentiation genes in the transition zone? We addressed this question by analyzing the transcription of the *Pax6*-dependent differentiation gene *Ngn2* (Scardigli et al., 2003). *Ngn2* transcription domain is nested within that of *Pax6* and lays immediately rostral to that of *Cdx4* (Fig. 1B; Fig. 3A), raising the possibility that *Cdx4* activity is incompatible with *Ngn2* transcription. To test this possibility, we analyzed *Ngn2* expression after *Cdx4*, *VP16Cdx4* and *EnRCdx4* overexpression. Overexpression of each of the construct independently resulted in *Ngn2* down regulation (Fig. 3B, C; n=6/6 for all conditions), despite that *Cdx4* and *VP16Cdx4* also induced *Pax6* transcription (*EnRCdx4* represses *Pax6* that is essential for ventral *Ngn2* transcription; Fig. 2Cc), suggesting that *Cdx4* represses *Ngn2*. To confirm that *Cdx4* represses *Ngn2* even in the presence of *Pax6*, we co-expressed *Cdx4* and *Pax6*

simultaneously. While Pax6 on its own can ectopically activate *Ngn2* (Fig 3Bd, C; n=6/6; Bel-Vialar et al., 2007 ), it is unable do so in the presence of Cdx4 (Fig. 3Be, C; n=6/6). Previous works showed Cdx4 as a transcriptional activator (Isaacs et al., 1998), suggesting that Cdx4 repression of *Ngn2* in these experiments is likely indirect. Taken together, our results suggest that Cdx4 promotes cell's entry into the differentiation program by inducing *Pax6* transcription, but prevents cell's further differentiation by inhibiting *Ngn2* activation (Fig. 3D).

Early differentiation of cells within the neural tube is accompanied by their withdrawal from the cell cycle (Lacomme et al., 2012; Shimojo et al., 2008). To test whether Cdx4 also regulates cell cycle exit, we analyzed the expression of *Hes5*, a Notch-pathway component that is a marker cell proliferation in the ventricular zone (Fior and Henrique, 2005). Overexpression of either *Cdx4* or *VP16Cdx4* repressed *Hes5*, whereas overexpression of *EnRCdx4* did not affect *Hes5* transcription (Fig. 3E; n=6/6 for all conditions). Given that *Hes5* is required for neural cell proliferation (Fior and Henrique, 2005), our result suggests that Cdx4 could indirectly control cell division. Previously, Pax6 was shown to activate *Hes5* in mouse cortical stem cells (Sansom et al., 2009), raising the possibility that Cdx4 regulates *Hes5* via Pax6. To test this scenario, we analyzed the effect of increasing or decreasing Pax6 over *Hes5* transcription. Unfortunately, the results were inconclusive, as both wild type and dominant negative *Pax6*, *EnRPax6*, reduced *Hes5* transcription 8 hpe (data not shown, n=6/6 embryos for each condition), preventing further analysis. Nevertheless, our results suggest that Cdx4 represses cell proliferation (*Hes5*) and differentiation (*Ngn2*) to promote cells to enter and subsequent sequestration in an early differentiation state.

## **Cdx4 initiates maturation of early pluripotent neural progenitor cells**

*Cdx4* transcription domain in the caudal neural plate is not restricted to the transition zone, but encompasses two additional pluripotent cell populations, the neuromesodermal progenitor (NMP) cells that express *T (Bra)* and *Sax1 (Nkx1.2* in mouse) (Henrique et al., 2015; Yamaguchi et al., 1999), and the early neural progenitor cells that only express *Sax1* (Delfino-Machin et al., 2005; Sasai et al., 2014). If, as our results suggest, *Cdx4* drives cells to enter an early neural differentiation state, then, what is *Cdx4* function in the two progenitor cell populations? To answer this question we analyzed *T (Bra)* and *Sax1* expression in embryos electroporated with different *Cdx4* constructs. While neither gain nor loss of *Cdx4* function altered *T (Bra)* transcription (Fig. 4A; n=6/6 for all), both conditions caused loss of *Sax1* expression (Fig. 4B, n=6/6 for all). These results suggest that *Cdx4* can regulate early neural progenitor cell fate decisions. The observation that dominant negative EnRCdx4 downregulates *Sax1* transcription suggests that *Cdx4* activity is also indirectly involved in *Sax1* activation (Fig. 4Bc). In contrast, the observation that *Cdx4* and constitutively active VP16Cdx4 also repress *Sax1* suggests the existence of an indirect mechanism of regulation that fine tunes *Sax1* transcription levels (Fig. 4Ba, b). A likely candidate to mediate such a mechanism is *Pax6*, as VP16Cdx4 induced this gene in the transition zone (Fig. 2A, B), and *Pax6* directs cells towards differentiation (Bel-Vialar et al., 2007). We tested this possibility even though *Cdx4* overexpression didn't expand *Pax6* expression in caudal neural tube (Fig. 2). Overexpression of *Pax6* did not change *Sax1* transcription in the caudal neural tube (Fig. 4C), suggesting that other as yet unidentified gene(s) mediate *Cdx4* indirect repression of *Sax1*. As *Cdx4* mediated *Sax1* downregulation does not alter *T (Bra)* transcriptional domain, these results suggest that *Cdx4* does not regulate NMP's neural

versus mesodermal cell decisions, but instead, *Cdx4* regulates neural progenitor cell maturation from their earliest time of specification.

### **Pax6 promotes late neural cell differentiation states by repressing *Cdx4* transcription**

*Cdx4*, *Sax1* and *Pax6* have clearly defined transcription domains, indicative of the existence of cross-regulatory interactions. For example, the expression domain of *Sax1* and *Pax6* in the transition zone are mutually exclusive. To determine the cross-regulatory interactions between *Cdx4*, *Sax1* and *Pax6*, we analyzed whether overexpression of *Sax1* and *Pax6* causes changes in *Cdx4* transcription. To analyze *Sax1* function, we overexpressed a mouse version of *Sax1* (*mSax1*, *Nkx1.2*), which has been shown to act as a repressor in mouse cell lines (Tamashiro et al., 2012) and chicken embryos (Sasai et al., 2014). As previously suggested (Sasai et al., 2014), overexpression of mouse *Sax1* represses *Pax6* (Fig. 5Ac, n=6/6). Furthermore, mouse *Sax1* repressed chicken *Sax1* transcription (Fig. 5Aa, n=6/6), suggesting that *Sax1* levels must be tightly controlled to maintain cells in a stem cell like state thereby preventing their premature differentiation. However, mouse *Sax1* overexpression didn't affect *Cdx4* transcription (Fig. 5Ab; n=6/6). Similar strategies were used to analyze *Pax6* regulation of *Cdx4*. Overexpression of *Pax6* downregulated and *EnRPax6* upregulated *Cdx4* transcription levels (Fig 5B; n=6/6 for all conditions). These results suggest that *Pax6* represses *Cdx4* in the rostral transition zone through indirect mechanisms that is unlikely to be mediated by the *Pax6*-target *Ngn2*, as the expression domain of *Cdx4* and *Ngn2* do not overlap (Fig. 1B; Fig. 3C). Taken together, these results support a network of feed forward and feedback regulatory interactions between *Sax1*, *Cdx4* and

Pax6 that promotes the gradual and sequential maturation of neuronal progenitor cells at the caudal end of the embryo (Fig. 5C).

## DISCUSSION

### Role of *Cdx4* in neurogenesis as a differentiation switch

*Cdx4* dynamic RC-DV gradient at the caudal end of the embryo overlaps with various cellular states involved in early spinal cord neurogenesis (Fig. 1A, B, C). At the caudal most end, *Cdx4* is transcribed in NMPs that are self-renewing and pluripotent, and can give rise to both mesoderm and neuroectoderm (Henrique et al., 2015). NMPs are principally defined by the co-expression of genes *T (Bra)* and *Sox2* (Henrique et al., 2015). In contrast, at the rostral end of the expression domain, *Cdx4* is transcribed in cells expressing early neural identity markers such *Pax6*. Rostral to the *Cdx4* expression domain, cells express the differentiation marker *Ngn2* (Fig. 1B; Fig. 3A). Our results support the idea that across its domain of expression, *Cdx4* interact with factors involved in onset of spinal cord neurogenesis.

At the caudal end of the embryo, NMPs differentiate to give rise to growing spinal cord tissue and surrounding mesoderm. NMPs express the mesodermal marker *T (Bra)* and the neural marker *Sox2*. According to current models, *T (Bra)* and *Sox2* cross regulation maintains NMP status in dynamic equilibrium (Henrique et al., 2015; Martin and Kimelman, 2012). A tilt in the equilibrium leading to accumulation of *T (Bra)* would lead to cells acquiring mesodermal fate, whereas a tilt favoring *Sox2* transcription would lead the cells to acquire a neural fate (Gouti et al., 2015; Henrique et al., 2015).

Recent evidence suggests that Cdx factors might also be involved in maintaining the balance of NMPs (Amin et al., 2016; Gouti et al., 2017). *Cdx2* mutant mice, compared to wild type, exhibit early axis truncation with deficiencies in mesodermal and ectodermal tissue after somite 5 (Chawengsaksophak et al., 2004; Savory et al., 2009). In this respect, *Cdx2* null mutants are similar to *T (Bra)* null mutants (Chawengsaksophak et al., 2004). Indeed, loss of *Cdx2* lead to reduction in *T (Bra)* expression domain post E9.5 (Savory et al., 2009). Conversely, *Cdx* triple mutants exhibit a complete loss of *T (Bra)* in the stem zone, suggesting a redundant function of Cdx in maintaining *T (Bra)* expression (van Rooijen et al., 2012). Even though Cdx2 binding sites were found on *T (Bra)* locus, Cdx dependent *T (Bra)* regulation has been suggested to occur via Cdx2 modulation of *Wnt3a* expression (Savory et al., 2009). In the current study, however, Cdx4 activity manipulation did not change the expression domain of *T (Bra)*. Overexpression of *Cdx4* or *VPI6Cdx4* did not upregulate *T (Bra)*, suggesting Cdx4 is not sufficient to induce *T (Bra)* (Fig. 4A). Conversely, constitutively repressive *EnRCdx4* did not lead to downregulation of *T (Bra)* expression. This could be a result of Cdx functional redundancy as other Cdx members were not altered. Also, as the Cdx dependent regulation of *T (Bra)* is suggested via modulation of *Wnt3a* signaling (Savory et al., 2009), given the observation that cells at the caudal end were sparsely electroporated, any change in *Wnt3a* expression wouldn't have been sufficient to downregulate *T (Bra)*.

NMPs also express pluripotency marker *Sax1* (*Nkx1.2* in mice). *Sax1* expression is maintained in the neural fated cells as they leave the NMP domain and become part of the neural plate. By contrast, newly differentiated mesodermal fated cells do not express *Sax1* (Delfino-Machin et al., 2005; Gouti et al., 2017), suggesting *Sax1* is a neural specific marker. While *Sax1* has been consistently used as a marker for pluripotent cells (Bertrand et al., 2000; Delfino-Machin et al.,

2005; Sasai et al., 2014), its function in promoting pro-neural fate in the caudal neural tube has not been investigated. However, a recent study suggested that *Sax1* acts a repressor and is involved in mediating upstream FGF signaling in inhibiting differentiation and promoting floor plate competence and induction (Sasai et al., 2014). In the caudal transition zone, *Sax1* expression is nested within the *Cdx4* expression domain. Our data showed that *Cdx4* negatively regulates *Sax1* (Fig. 4B). Significantly, *Cdx4* repression of *Sax1* was indirect, as VP16*Cdx4*, the constitutively active form of *Cdx4* also repressed *Sax1*. Surprisingly EnRC*Cdx4*, the constitutive repressor form of *Cdx4* also repressed *Sax1* suggesting that loss of function of *Cdx4* also downregulated *Sax1*. One possibility is that *Cdx4* regulates *Sax1* by activating its activator (for example *Wnt3a* (van Rooijen et al., 2012)) and also its inhibitor (currently unknown), which would explain why both constitutive active and repressive forms of *Cdx4* resulted in the same phenotype. Another possibility is that *Cdx4* inhibits activator of *Sax1* while promoting its repressor. We speculate is that in the caudal stem zone *Cdx4* dependent repression is not dominant due to high concentration of signaling factors FGF/Wnt that induces both *Sax1* and *Cdx4* (Bel-Vialar et al., 2002; Bertrand et al., 2000; Diez del Corral et al., 2002; Nordstrom et al., 2006; Tamashiro et al., 2012). High levels of FGF/Wnt signaling are capable of repressing the *Cdx4* dependent repressor of *Sax1* or can outcompete its activity. However, in the caudal transition zone *Cdx4* dependent repression is able to outcompete FGF/Wnt dependent *Sax1* activation leading to *Sax1* downregulation in the transition zone.

It is important to mention that despite the downregulation of *Sax1* in neural plate in *Cdx4* overexpression experiments, there was no observable change in the expression domain of *T* (*Bra*), as previously mentioned. This suggests that *Cdx4* is not directly involved in determining the size of NMP domain and might be playing an indirect role in balancing neural and



mesodermal specification by regulating levels of *T(Bra)*. Further research would help clarify whether if Cdx factors promote neural or mesodermal fates in the NMPs or perhaps both.

Cdx4 dependent downregulation of *Sax1* in the pro-neural cells located in the caudal transition zone has two implications: downregulating pluripotency and promoting differentiation. *Sax1* has been shown to inhibit *Pax6* and *Irx3* expression in caudal neural tube (Sasai et al., 2014), thereby indirectly promoting expression of floor plate specification factors. By downregulating *Sax1*, Cdx4 primes the neural progenitor cells to begin their differentiation by getting rid of the repression, thus rendering the neural tube competent to respond to differentiating signals. Cdx4's role in furthering differentiation of pro-neural cells appears to also involve the activation of *Pax6* (Fig. 2). This activity only takes place in the rostral portion of the transition zone because Cdx4 activation of *Pax6* transcription is dependent on RA signaling. Hence, Cdx4 promotes acquisition of neural identity by two mechanisms, by downregulating pluripotency by indirectly repressing *Sax1*, which otherwise inhibits *Pax6*; and by directly activating *Pax6*.

As mentioned above, Cdx4 mediated regulation of *Pax6* is dependent on RA and thereby restricted at the rostral transition zone. Multiple mechanisms have been proposed to explain the lack of *Pax6* expression at the caudal end. First, FGF signaling has been suggested to inhibit *Pax6* via higher-order chromosomal modification resulting in the *Pax6* locus being inaccessible to activators (Patel et al., 2013). This could explain the inability of Cdx4 to activate *Pax6* in the caudal stem zone, as it is incapable of accessing the *Pax6* locus. However, as observed, VP16Cdx4 was able to prematurely activate *Pax6* in the caudal transition zone suggesting that locus inaccessibility is not the only reason for *Pax6* inhibition. Second, *Sax1* is a known inhibitor of *Pax6* in the newly differentiated pro-neural cells. However, our results showed that while *Cdx4* overexpression downregulates *Sax1*, this downregulation is not concomitant with *Pax6*

activation in *Sax1*- cells. The discrepancy between the abilities of Cdx4 and VP16Cdx4 to activate *Pax6* suggests that in addition to chromatin accessibility and absence of Sax1, Cdx4 also likely requires a co-factor(s) in order to activate *Pax6*.

In the presence of RA, Cdx4 was able to activate *Pax6* similar to VP16Cdx4 (Fig. 2C). RA has been implicated in opening up the *Pax6* locus by antagonizing FGF signaling (Patel et al., 2013). In addition, the *Pax6* locus also contains retinoic acid response elements (RAREs) (Cunningham et al., 2016), suggesting RA-RAR and Cdx4 cooperate at the promoter levels to activate *Pax6*. Cdx factors are known to regulate *Hox* gene activation via chromatin remodeling (Mazzoni et al., 2013), suggesting another possibility that Cdx4, in the presence of RA, can promote an open chromatin structure, thus exposing the *Pax6* locus to regulation. Thus, while it is unclear how RA modulates Cdx4 activity in the transition zone, epigenetic modification is the most probable candidate.

The final step in our model proposes that Cdx4 prevents the further differentiation of cells promoted by Pax6. Pax6 promotes cell differentiation by activating several downstream targets, including *Ngn2*. In the neural tube flanked by somites, *Ngn2* is expressed in a subset of *Pax6*+ cells where it promotes cell cycle exit and further differentiation (Lacomme et al., 2012). This expression of *Ngn2* in the intermediate domain of neural tube is under direct Pax6 regulation (Scardigli et al., 2003), as suggested by lowered *Ngn2* expression in *Pax6* mutants compared to wild type mice (Bel-Vialar et al., 2007). In the neural tube domain where *Cdx4* and *Pax6* overlap, *Ngn2* is not transcribed (Fig. 3A). Our experiments demonstrated that Cdx4 can repress *Ngn2* transcription (Fig. 3B), suggesting that Cdx4 primes the cells for differentiation but does not let them differentiate just yet. As *Cdx4* expression gets dorsally restricted, Pax6 is now able to activate *Ngn2* in the ventral neural tube regions. This is evident from ventral expression of

*Ngn2* in the early neural tube (Fig. 3A). As Cdx factors are known to act as transcriptional activators, the negative regulation of *Ngn2* seems to be indirect, but does not involve promoting proliferation (Fig. 3E). Indirect regulation could also provide a time delay between *Cdx4* elimination and *Ngn2* activation.

### **Integration of signaling and transcription factor models during spinal cord neurogenesis**

The proposed GRN (Fig. 6), with *Cdx4* at its core, involved in progression of cellular states in caudal neural tube could be acting under the signaling switch proposed by Diez del Corral (2003) and Olivera-Martinez and Storey (2007). High concentration of FGF/Wnt signaling in the caudal stem zone leads to activation of *T (Bra)*, *Sax1* and *Cdx4*. With the decrease in FGF/Wnt signaling strength in the transition zone *Cdx4* is able to downregulate *Sax1*. *Wnt8c* is responsible for activating *Raldh2* in the somites, where *Wnt8c* is able to overcome FGF repression of *Raldh2*. RA synthesized in somites then diffuses caudally into the neural tube, and promotes differentiation of competent cells in the rostral transition zone. *Cdx4* is responsible for initial activation of *Pax6* in combination with RA; however, in the neural tube flanked by somites, RA can maintain *Pax6* expression in a *Cdx4* independent manner. In the rostral transition zone, *Pax6* activation drives cells to acquire neural identity. However, the presence of *Cdx4* prevents them from turning on *Ngn2* and further differentiating. Once *Cdx4* starts clearing from the ventral neural tube, *Pax6*<sup>+</sup> cells start upregulating *Ngn2* and acquire neurogenic identity.

Altogether, FGF-Wnt-RA provides spatial information to the maturing neural cells, in addition to driving transition in signaling factors. The transcription network in the NMPs responds to this spatio-temporal information and regulates the pace of differentiation in the maturing neural cells.

## **Cdx role in coordinating FGF-Wnt-RA signaling information**

In regulating spinal cord neurogenesis, Cdx factors coordinate FGF, Wnt and RA signaling information that other studies have shown to direct spinal cord cell maturation (Diez del Corral et al., 2003; Olivera-Martinez and Storey, 2007). Our results show that with respect to maturation of spinal cord progenitors, Cdx4 acts antagonistically to FGF-Wnt signaling in the caudal end. FGF-Wnt signaling directs activation of pluripotency marker *Sax1* (Diez del Corral et al., 2002; Tamashiro et al., 2012), in addition to activating *Cdx4* that, as our results show, represses *Sax1* (Fig. 4B). Hence, while FGF-Wnt signaling promotes pluripotency, the downstream target Cdx4 antagonizes pluripotency and primes the cells towards their differentiation pathway. Thus, in controlling *Sax1* transcription, Cdx4 provides a feedforward mechanism that is antagonistic to FGF-Wnt activity. A similar antagonism was observed in the regulation of *Pax6*, where FGF represses *Pax6* (Bertrand et al., 2000) while Cdx4 promotes its induction (Fig. 2). In contrast, Cdx4 cooperates with RA in promoting *Pax6* transcription and differentiation. In all, Cdx4 acts antagonistically to the inducing FGF-Wnt signaling and synergistically with the RA signaling in promoting sequential maturation of cells. Interestingly, however, Cdx factors cooperate with FGF-Wnt but not RA during spinal cord specification and patterning, which is contradictory to our findings for cellular maturation within the spinal cord. In regulating spinal cord patterning, Cdx factors act downstream of FGF and Wnt signaling in activating caudal 5' *Hox* genes to bestow identity to brachial and thoracic regions of the spinal cord (Bel-Vialar et al., 2002; Marletaz et al., 2015; Nordstrom et al., 2006; Shimizu et al., 2006). Cdx factors also inhibit rostral identities by repressing 3' *Hox* genes that are in turn activated by RA signaling (Lee and Skromne, 2014; Marletaz et al., 2015; Skromne et

al., 2007). Hence, Cdx factors cooperate with FGF-Wnt signaling and antagonize RA signaling during patterning of the hindbrain and spinal cord.

Our findings indicate that Cdx factors coordinate the signaling information from the FGF-Wnt-RA factors in a contrasting manner depending upon the functional context during spinal cord development. One possible explanation is that the access of Cdx factors to the regulatory regions is controlled by the signaling information. This is evident in the case of *Pax6* transcription, where FGF signaling leads to higher order chromosomal silencing of *Pax6* (Patel et al., 2013). Recent evidence showed that FGF signaling lead to translocation of the *Pax6* locus to nuclear boundary, which has been associated with chromatin inactivity (Patel et al., 2013).

Downregulation of FGF signaling leads to removal of higher order chromatin modifications that impeded access of regulators to the *Pax6* locus. Another possibility is the availability of cofactors that are regulated by signaling information, as in the case of Cdx regulation of intestinal differentiation. During intestinal stem cell maturation, CDX2 has been shown to associate with Wnt signaling transcription factor TCF4, to achieve tissue specific Wnt function (Verzi et al., 2010). Thus, while Cdx factors would act as an activator, the epigenetic state of the the genomic target sites, the signaling state of the cell and the availability of other transcription factors in the cell, will ultimately determine whether Cdx target genes are activated or not.

In conclusion, we find that Cdx factors are at the core of GRNs that regulate patterning and differentiation across tissues during vertebrate embryonic development. Importantly, the role of Cdx factors as coordinators of upstream signaling make them indispensable for proper embryonic development.

## **MATERIALS AND METHODS**

### **Chicken embryo incubation and harvesting**

Fertilized broiler chicken eggs (Morris Hatchery, Inc.; Miami, FL) were incubated at 38.2° C in a humid chamber until reaching the appropriate stage of development. The embryos were staged according to Hamburger and Hamilton normal table of development (Hamburger and Hamilton, 1951). Embryos post-electroporation were incubated until stipulated time for further analysis.

### **DNA constructs and chicken *in ovo* electroporation**

Gene over expression studies were done using standard cloning and electroporation techniques. To achieve high level of gene expression and to track electroporated cells, gene of interest was cloned either into pCIG or pCAGIG vectors (Matsuda and Cepko, 2004; Megason and McMahon, 2002). These vectors use the chicken *Actin* promoter to drive high gene expression levels, and carry a *GFP* gene as a reporter for transcription. Genes of interest were either cloned into vectors in the laboratory (Cdx4, VP16Cdx4, EnRCdx4, mNkx1.2; for details see supplementary material), or obtained already in the appropriate vector from other laboratories (Pax6-pCIG and EnRPax6-pCIG were kindly provided by Dr. Francois Medevielle (Bel-Vialar et al., 2007); and mNkx1.2-pEF2 was kindly provided by Dr. Yusuke Marikawa (Tamashiro et al., 2012)). Plasmids for electroporation were purified using QIAGEN maxi-prep kit, and diluted to a final concentration of 0.5 µg/µl in 1X PBS, with 50ng/ml Fast Green dye to aid in the visualization of the cocktail mix during the procedure. Neural tube of chicken embryos stage HH10-11 were injected with the DNA cocktail mix and immediately electroporated unilaterally following standard protocols (Itasaki et al., 1999; Nakamura and Funahashi, 2001). Only normal-looking embryos with good electroporation in the desired region (e.g., neural tube, transition

zone, or caudal neural plate depending on experimental requirements) were selected for further processing by *in situ* hybridization or immunohistochemistry. Analysis was focused on same axial level in all stage: transition zone for stage HH12-13 (prospective thoracic level; Liu et al., 2001), and thoracic level for stage HH16-17 (somites 20-25; Evans, 2003).

### ***In situ* hybridization**

Analysis of gene transcription by *in situ* hybridization was done using digoxigenin (DIG)-labeled antisense RNA probes synthesized and hybridized using standard protocol (Wilkinson and Nieto, 1993). Briefly, embryos were harvested at the appropriate stage and fixed with 4% paraformaldehyde diluted in 1x PBS at 4 °C overnight, before processing for *in situ* hybridization. After a series of washes, embryos were exposed overnight in hybridization solution to DIG-labeled antisense RNA probes against *Pax6*, *Hes5*, *Sax1*, *T (Bra)*, or *Cdx4*. mRNA expression was detected using an Alkaline Phosphatase coupled Anti-DIG antibody (Roche) and developing embryos with nitro-blue tetrazolium salt (NBT, Thermo Scientific) and 5-bromo-4-chloro-3-indolyl-phosphate (BCIP, Biosynth) at room temperature until dark purple precipitate deposited revealing the areas of gene transcription. Post-development, embryos were washed with 1x TBST and then fixed in 4% PFA.

### **Cryo-sectioning and Immunohistochemistry**

Embryos harvested for immunohistochemistry (IHC) analysis were fixed with 4 % PFA for 3 hours at room temperature. Embryos were then embedded in Shandon M1 embedding matrix media (Thermo Scientific) and quickly frozen over dry ice. Mounted embryos were sectioned on Leica CM1850 cryostat and consecutive 20 µm thick sections were collected on positive-charged

glass slides (Globe scientific). Antibody staining was performed following standard protocols on slides stacked in Shandon Sequenza slide rack (Thermo Scientific) and supported by Shandon cover plates.

Primary antibodies against anti-mouse Pax6, Pax7 and Nkx6.1 were obtained from Development Studies Hybridoma Bank. Anti-chicken Ngn2 antibody was a kind gift from Dr. Bennett Novitch (Skaggs et al., 2011). Rabbit polyclonal antibody against GFP Tag was obtained from AnaSpec Inc. Goat anti-mouse Alexa Flour 488, Alexa Flour 556 and goat anti-guinea pig Alexa Flour 568 secondary antibodies (Invitrogen) were used for detecting primary antibodies. Sections were covered with DAPI-containing mounting media (Vecta shield) and a cover slip, and sealed with nail polish.

## **Microscopy**

Whole embryo images were taken on Zeiss V20 Stereo microscope with an AxioCam MRc digital color camera (Carl Zeiss). Images of transverse section of neural tube were taken on AXIO Examiner Z1 compound microscope with an AxioCam MRc color camera (Carl Zeiss), or on a Leica SP5 confocal microscope (Leica). Confocal images, thickness 2.304  $\mu\text{m}$ , were processed with ImageJ (Schneider et al., 2012). Images were processed for figures using Adobe Photoshop (CC2017, Adobe) for size and resolution adjustment, and for figure preparation.

## **Quantification of IHC data**

To quantify changes in the levels of candidate proteins after electroporation, cells positive for Pax6 or Ngn2 were counted on both electroporated and control sides at the same dorso-ventral position, and their relative ratio was determined. Images were processed with ImageJ IHC



toolbox plugin (Shu et al., 2013) before cell counting to select for cells above threshold level as determined by the program algorithm. A total of 6 embryos per conditions were used for determining significance. Significance of difference between mean values of compared pairs was evaluated using two-tailed t-test (Microsoft Excel). Data for each condition was graphed into a box-plus-scatter plot using MATLAB (2014b, The MathWorks Inc., Natick, MA, 2014).

## **AUTHOR CONTRIBUTIONS**

P.J. and I.S. designed the experiments. P.J. performed the experiments. A. J. D. provided intellectual contributions towards designing and troubleshooting experiments. P.J. and I.S. analyzed the results. P.J., A.J.D and I.S. wrote the manuscript.

## **ACKNOWLEDGEMENTS**

We thank all members of Skromne lab for intellectual insights, particularly Dr. S. Bandopadhyay. We also thank Dr. K. G. Story (U Dundee, UK), Dr. M. Gouldin (Salk Institute, USA), Dr. F. Medeville (CBI, France), Dr. S. Mackem (NCI, USA), Dr. Y. Marikawa (U Hawaii, USA), Dr. A. V. Morales (Cajal Institute, Spain) and Dr. B. Novitch (UCLA, USA) for generously providing essential constructs and antibodies. P. J. was supported by Sigma XI GIAR, and the University of Miami College of Art and Science Dean's summer and dissertation grants. I. S. was supported by University of Miami College of Arts and Sciences and the Neuroscience Program, and by the National Science Foundation (IOS-090449).

## FIGURE LEGENDS

**Figure 1. Cdx4 activates transcription of the neurogenesis gene *Pax6*.** (A) Schematic representation of the caudal end of HH10 chicken embryo showing primary subdivisions (adapted from Olivera-Martinez and Storey, 2007), and expression domain of key transcription and signaling factors (left and right of diagram, respectively). (B) *Cdx4* is transcribed in a dynamic dorso-ventral (DV) gradient along the rostro-caudal (RC) axis of the embryo (HH11). Red lines indicate position of transverse sections shown on right. (C) Distribution of Pax7 (dorsal), Pax6 (dorsal-to-intermediate), and Nkx6.1 (ventral) protein relative to *Cdx4* transcription domain reveals dynamic but poorly correlated spatial relationships. (D) *Cdx4* does not regulate DV patterning in the neural tube. Ectopic *Cdx4* did not change the distribution of Pax7 or Nkx6.2 proteins (n=6/6 for both), but caused ectopic Pax6 accumulation outside its normal domain (arrowheads, n=6/6; Control pCIG experiments: Fig.S1). Marker proteins are in red and electroporated cells are in green (nuclear GFP tag). Embryos were electroporated at HH10-11 and analyzed 24 hours post-electroporation (hpe). (E) Summary of results. Scale bar 200 $\mu$ m (whole mount); 40 $\mu$ m (transverse section).

**Figure 2. Cdx4 activation of *Pax6* transcription is RA-dependent.** (A) In the transition zone, *Cdx4* is not sufficient to activate *Pax6* transcription. Overexpression of constitutive active *VP16Cdx4* (b, b'; n=4/6) but not wild type *Cdx4* (a, a'; n=6/6) results in high levels of *Pax6* transcription (arrowheads; control experiments Fig. S1). Overexpression of dominant negative *EnRCdx4* downregulates *Pax6* transcription (c, c', box; n=6/6; control experiments Fig. S1). Expression of *Pax6* was detected in purple by *in situ* hybridization (ISH), and electroporated cells by anti-GFP immunohistochemistry. Embryos were electroporated at HH10-11 and

analyzed 8 hpe. **(B)** In the transition zone, constitutive active Cdx4 (VP16Cdx4; n=3/4), but not wild type Cdx4, leads to Pax6 protein accumulation (arrowheads). **(C)** In the neural tube, Cdx4 requires Retinoic Acid (RA) to activate *Pax6* transcription. *Cdx4* and *VP16Cdx4* overexpression result in ectopic Pax6 protein accumulation dorsally and ventrally (a, a', b, b'; arrowheads; n=6/6 for both). Overexpression of *EnRCdx4* downregulates Pax6 (c, c'; box; n=6/6). RA-signaling inhibition using a dominant negative RA receptor (dnRAR) downregulates Pax6 (d, d'; box; n=6/6). Cdx4 is unable to induce ectopic Pax6 in the absence of RA (e, e'; box; n=6/6). VP16Cdx4 induces ectopic Pax6 even in the absence of RA signaling (f, f'; arrowheads; n=6/6). Embryos were electroporated at HH10-11 and analyzed 24 hpe. **(D)** Quantification of Pax6 positive cells after experiments shown in C. Box-scatter plot representing ratio of Pax6 positive cells on electroporated side to that on the contralateral control side (as per Karaz et al., 2016). Cells were counted using ImageJ. Significance is shown with a bar and a star (two tailed t-test analysis, p<0.05). **(E)** Summary of results. Scale bar 200µm (whole mount); 40µm (transverse section).

**Figure 3. Cdx4 inhibits early cell maturation by repressing the neural differentiation *Ngn2* and the cell cycle gene *Hes5*.** **(A)** Wild type expression of *Ngn2* at HH11 embryo. Expression of this gene initiates in the ventral neural tube around the most recent formed somite (a, a'). **(B)** Cdx4 represses *Ngn2* even in the presence of the *Ngn2*-activator Pax6. Cdx4 and VP16Cdx4 repress *Ngn2* (a, a', b, b'; boxes; n=6/6 for both; control experiments Fig. S1), despite inducing its activator Pax6 (Fig. 2Ca, b). *EnRCdx4* represses *Ngn2* (c, c'; box; n=6/6; control experiments Fig. S1) and Pax6 (Fig. 2Cc). Pax6 induces *Ngn2* (d, d'; arrowhead; n=6/6) but not in the presence of Cdx4 (e, e'; box; n=6/6). **(C)** Quantification of *Ngn2* positive cells after

experiments shown in B. Box-scatter plot representing ratio of Ngn2 positive cells on electroporated side versus contralateral control side. Cells were counted using ImageJ. Significance is shown with a bar and a star (two tailed t-test analysis,  $p < 0.05$ ). **(D)** Figure summarizing Cdx4-Pax6-Ngn2 interactions. **(E)** Cdx4 represses the cell cycle marker *Hes5*. Cdx4 (a, a') and VP16Cdx4 (b, b') represses (boxes), whereas EnRCdx4 does not alter *Hes5* transcription in the transition zone ( $n=6/6$  for all conditions). Scale bar 200 $\mu$ m (whole mount); 40 $\mu$ m (transverse section).

**Figure 4. Cdx4 represses pluripotency in early neural progenitors, but not in neuromesodermal progenitor cell.** **(A)** Cdx4 does not regulate the neuromesodermal progenitor (NMP) marker *T (Bra)*. Neither Cdx4 (a, a'), VP16Cdx4 (b, b') nor EnRCdx4 (c, c') alter *T (Bra)* expression in NMPs ( $n=6/6$  for all conditions). **(B)** Cdx4 represses early neural progenitor marker *Sax1*. Overexpression of *Cdx4* (a, a') or *VP16Cdx4* (b, b') inhibit *Sax1* transcription (boxes; control experiments Fig. S1). *EnRCdx4* overexpression also downregulates *Sax1* (c, c') ( $n=6/6$  for all conditions; control experiments Fig. S1). **(C)** Pax6 does not regulate *Sax1* transcription ( $n=6/6$ ). **(D)** Figure summarizing Cdx4-Sax1 interactions. Scale bar 200 $\mu$ m (whole mount); 40 $\mu$ m (transverse section, separate scale bar for Bc', c'' shown).

**Figure 5. Sax1 and Pax6 feedback interactions regulate Cdx4 transcription.** **(A)** *Sax1* downregulates the transcription of its own gene and of *Pax6*, but not *Cdx4*. *mSax1* overexpression downregulates *cSax1* and *Pax6* transcription (a, a', c, c'; boxes;  $n=6/6$  for both). However, *mSax1* overexpression does not alter *Cdx4* transcription (b, b';  $n=6/6$ ). **(B)** Pax6 represses *Cdx4*. Ectopic *Pax6* downregulates (a, a';  $n=6/6$ ), and *EnRPax6* upregulates (b, b';

n=6/6; control experiments Fig. S1) *Cdx4* transcription. (C) Figure summarizing *Sax1-Cdx4-Pax6* interactions. Scale bar 200 $\mu$ m (whole mount); 40 $\mu$ m (transverse section).

**Figure 6. Proposed gene regulatory network controlling spinal cord neurogenesis.** Gene regulatory network of the genetic interactions identified in figures 1-5, superimposed to the FGF-Wnt8C-RA signaling network shown by others to regulate cell transitions states during spinal cord neurogenesis (Olivera-Martinez and Storey, 2007). Network map was generated using Biotapestry (Longabaugh et al., 2005). In this model, *Cdx4* is at the core of the gene regulatory network that coordinates upstream signaling information into downstream transcriptional response.

## SUPPLEMENTAL MATERIALS AND METHODS

Gene and gene constructs employed in this work were either obtained from other laboratories, or generated by us using standard molecular biology techniques and publicly available annotated sequences. A list of genes and constructs obtained from other laboratories is summarized in Table S1, and a list of primers for genes and constructs generated by us is summarized in Table S2.

| <b>Table S1. Genes and constructs received from other labs.</b> |                              |                                             |                   |
|-----------------------------------------------------------------|------------------------------|---------------------------------------------|-------------------|
| <b>Gene construct</b>                                           | <b>Purpose</b>               | <b>Sources</b>                              | <b>References</b> |
| <i>Pax6</i> -pBS                                                | <i>In situ</i> hybridization | Dr. Martyn Gouldin<br>(Salk Institute, USA) |                   |

|                               |                                        |                                                    |                                    |
|-------------------------------|----------------------------------------|----------------------------------------------------|------------------------------------|
| <i>Ngn2</i> -pBS              | <i>In situ</i><br>hybridization        | Dr. Francois Medevielle<br>(CBI, Toulouse, France) | (Bel-Vialar et al., 2007)          |
| <i>Pax6</i> -pCIG             | Electroporation                        |                                                    |                                    |
| <i>EnRPax6</i> -<br>pCIG      | Electroporation                        |                                                    |                                    |
| Chick-<br><i>T(Bra)</i> - pBS | <i>In situ</i><br>hybridization        | Dr. Susan Mackem<br>(NCI, USA)                     | (Liu et al., 2003)                 |
| <i>mNkx1.2</i> -<br>pEF2      | For generating<br><i>mNkx1.2</i> -pCIG | Dr. Yusuke Marikawa<br>( U of Hawaii, USA)         | (Tamashiro et al., 2012)           |
| <i>dnRAR</i> -pCIG            | Electroporation                        | Dr. Axia V. Morales<br>(Cajal Institute, Spain)    | (Martinez-Morales et<br>al., 2011) |

*Full length Cdx4 for in situ hybridization and sub-cloning (Cdx4-pGEM-T-Easy).* Full length *Cdx4* (NM\_204614.1) was cloned from reverse transcribed, total mRNA from chicken embryos at different stages of development (HH4-HH12; qScript cDNA Synthesis kit, Quantabio), using primers designed with the online program Primer BLAST (Table S2). Fragment product of the correct size was TA cloned using pGem-T Easy Plasmid (Promega,). Cloning of the correct gene was confirmed by sequencing. This construct was used to generate *in situ* hybridization probe and as a template for additional construct.

*Full length Cdx4 for chicken electroporation (Cdx4-pCIG).* Full-length chicken *Cdx4* was digested with *SpeI* and blunt ended with Mung Bean nuclease (NEB). Purified, linear *Cdx4* was then digested with *EcoRI*. The purified *Cdx4* fragment was then subcloned into pCIG previously

digested with EcoRI-SmaI. This construct was used for overexpressing wild type Cdx4 in chicken embryos by electroporation. pCIG contains nuclear GFP under IRES promoter for concomitant expression of GFP in electroporated cells (Megason and McMahon, 2002).

*Constitutively active Cdx4 for chicken electroporation (VP16Cdx4-pCIG).* The transactivator domain of the VP16 was amplified from VP16-pCS2+ and fused to the C-terminal domain of Cdx4 containing the DNA binding homeodomain (corresponding to amino acids 119-364; renamed Cdx4-HD). Primers used for these amplifications are described in Table S2. Chimeric VP16Cdx4 was then generated by PCR amplification from a mixture containing VP16 and Cdx4-HD fragments and VP16 forward and Cdx4-HD reverse primer. The segment was cloned into pGEM-T-easy and open reading frame confirmed by sequencing. VP16Cdx4 was then digested using ClaI-EcoRI and inserted into ClaI-EcoRI sites of pCIG.

*Dominant negative Cdx4 for chicken electroporation (EnRCdx4-pCAGIG).* Engrailed (EnR) repressor domain from EnR-pCS2+ was digested with XhoI and blunt ended with Mung Bean nuclease. After purification, the fragment was digested with EcoRI and re-purified. This EcoRI-blunt EnR product was ligated to a blunt ended Cdx4 fragment generated using SmaI (nucleotide site 328). As a final step, the chimeric construct was ligated to pCAGIG vector digested with EcoRI-EcoRV. Several clones were analyzed by sequencing to confirm correct orientation of the EnR and Cdx4 fragments, and the continuity of the open reading frame. pCAGIG contains GFP under IRES promoter for concomitant expression of cytoplasmic GFP in electroporated cells. pCIG is derived from pCAGIG backbone, with addition of nuclear localization signal in front of GFP, making to GFP concentrate in nucleus (Matsuda and Cepko, 2004).

| <b>Table S2. Genes cloned in the lab with respective primers.</b> |                                                                                                               |                       |
|-------------------------------------------------------------------|---------------------------------------------------------------------------------------------------------------|-----------------------|
| <b>Gene construct</b>                                             | <b>Primers</b>                                                                                                | <b>Notes</b>          |
| Cdx4                                                              | Forward: ACATGTATGTGAGTTCTCTCTTGG                                                                             | Ta: 55 <sup>0</sup> C |
|                                                                   | Reverse: TGATCATTCTGAAACTATGAC                                                                                |                       |
| VP16                                                              | Forward: <u>ATCGATATGTCAAGGCCTCTCGAGTCGAC</u><br>(ClaI site underlined.)                                      | Ta: 50 <sup>0</sup> C |
|                                                                   | Reverse: TGTGTGCCAACCCACCGTACTCGTCAATT                                                                        |                       |
| Cdx4-HD                                                           | Forward: GAGTACGGTGGGGTTGGCACACAGCAGGTC                                                                       | Ta: 55 <sup>0</sup> C |
|                                                                   | Reverse: TGATCATTCTGAAACTATGAC                                                                                |                       |
| mNkx1.2                                                           | Forward: AT <u>ATCGAT</u> <i>CCACCATGTTGGCATGGCAGG</i><br>(ClaI site underlined, Kozack sequence italicized.) | Ta: 60 <sup>0</sup> C |
|                                                                   | Reverse: <u>GAGAATTCTCATAGGTGTGGAGCATAG</u><br>(EcoRI site underlined.)                                       |                       |

*Full length mNkx1.2 for chicken electroporation (mNkx1.2 pCIG).* Mouse Nkx1.2 was PCR amplified from the mNkx1.2-myctag pEf2 construct (gift from Y. Marikawa), using the primers shown in Table S2. The cloned segment was digested with ClaI and EcoRI included in the forward and reverse primers, respectively. Purified segment was then cloned into ClaI-EcoRI site of pCIG.



## REFERENCES

1. Amin, S., Neijts, R., Simmini, S., van Rooijen, C., Tan, S.C., Kester, L., van Oudenaarden, A., Creighton, M.P., Deschamps, J., 2016. Cdx and T Brachyury Co-activate Growth Signaling in the Embryonic Axial Progenitor Niche. *Cell reports* 17, 3165-3177.
2. Beck, F., Chawengsaksophak, K., Waring, P., Playford, R.J., Furness, J.B., 1999. Reprogramming of intestinal differentiation and intercalary regeneration in Cdx2 mutant mice. *Proceedings of the National Academy of Sciences of the United States of America* 96, 7318-7323.
3. Bel-Vialar, S., Itasaki, N., Krumlauf, R., 2002. Initiating Hox gene expression: in the early chick neural tube differential sensitivity to FGF and RA signaling subdivides the HoxB genes in two distinct groups. *Development (Cambridge, England)* 129, 5103-5115.
4. Bel-Vialar, S., Medevielle, F., Pituello, F., 2007. The on/off of Pax6 controls the tempo of neuronal differentiation in the developing spinal cord. *Developmental biology* 305, 659-673.
5. Bertrand, N., Medevielle, F., Pituello, F., 2000. FGF signalling controls the timing of Pax6 activation in the neural tube. *Development (Cambridge, England)* 127, 4837-4843.
6. Boulet, A.M., Capecchi, M.R., 2012. Signaling by FGF4 and FGF8 is required for axial elongation of the mouse embryo. *Developmental biology* 371, 235-245.
7. Briscoe, J., Pierani, A., Jessell, T.M., Ericson, J., 2000. A homeodomain protein code specifies progenitor cell identity and neuronal fate in the ventral neural tube. *Cell* 101, 435-445.

8. Brown, J.M., Storey, K.G., 2000. A region of the vertebrate neural plate in which neighbouring cells can adopt neural or epidermal fates. *Current biology* : CB 10, 869-872.
9. Butler, S.J., Bronner, M.E., 2015. From classical to current: analyzing peripheral nervous system and spinal cord lineage and fate. *Developmental biology* 398, 135-146.
10. Cambray, N., Wilson, V., 2007. Two distinct sources for a population of maturing axial progenitors. *Development (Cambridge, England)* 134, 2829-2840.
11. Chang, J., Skromne, I., Ho, R.K., 2016. CDX4 and retinoic acid interact to position the hindbrain-spinal cord transition. *Developmental biology* 410, 178-189.
12. Chawengsaksophak, K., de Graaff, W., Rossant, J., Deschamps, J., Beck, F., 2004. Cdx2 is essential for axial elongation in mouse development. *Proceedings of the National Academy of Sciences of the United States of America* 101, 7641-7645.
13. Cunningham, T.J., Colas, A., Duester, G., 2016. Early molecular events during retinoic acid induced differentiation of neuromesodermal progenitors. *Biology open* 5, 1821-1833.
14. Davidson, A.J., Ernst, P., Wang, Y., Dekens, M.P., Kingsley, P.D., Palis, J., Korsmeyer, S.J., Daley, G.Q., Zon, L.I., 2003. cdx4 mutants fail to specify blood progenitors and can be rescued by multiple hox genes. *Nature* 425, 300-306.
15. Davidson, E.H., 2006. *The Regulatory Genome*. Academic Press, Burlington.
16. Davidson, E.H., Levine, M.S., 2008. Properties of developmental gene regulatory networks. *Proceedings of the National Academy of Sciences of the United States of America* 105, 20063-20066.

17. Delfino-Machin, M., Lunn, J.S., Breitkreuz, D.N., Akai, J., Storey, K.G., 2005. Specification and maintenance of the spinal cord stem zone. *Development (Cambridge, England)* 132, 4273-4283.
18. Deschamps, J., van den Akker, E., Forlani, S., De Graaff, W., Oosterveen, T., Roelen, B., Roelfsema, J., 1999. Initiation, establishment and maintenance of Hox gene expression patterns in the mouse. *The International journal of developmental biology* 43, 635-650.
19. Deschamps, J., van Nes, J., 2005. Developmental regulation of the Hox genes during axial morphogenesis in the mouse. *Development (Cambridge, England)* 132, 2931-2942.
20. Diez del Corral, R., Breitkreuz, D.N., Storey, K.G., 2002. Onset of neuronal differentiation is regulated by paraxial mesoderm and requires attenuation of FGF signalling. *Development (Cambridge, England)* 129, 1681-1691.
21. Diez del Corral, R., Olivera-Martinez, I., Goriely, A., Gale, E., Maden, M., Storey, K., 2003. Opposing FGF and retinoid pathways control ventral neural pattern, neuronal differentiation, and segmentation during body axis extension. *Neuron* 40, 65-79.
22. Diez del Corral, R., Storey, K.G., 2004. Opposing FGF and retinoid pathways: a signalling switch that controls differentiation and patterning onset in the extending vertebrate body axis. *BioEssays : news and reviews in molecular, cellular and developmental biology* 26, 857-869.
23. Evans, D.J., 2003. Contribution of somitic cells to the avian ribs. *Developmental biology* 256, 114-126.
24. Faas, L., Isaacs, H.V., 2009. Overlapping functions of Cdx1, Cdx2, and Cdx4 in the development of the amphibian *Xenopus tropicalis*. *Developmental dynamics : an official publication of the American Association of Anatomists* 238, 835-852.

25. Fior, R., Henrique, D., 2005. A novel *hes5/hes6* circuitry of negative regulation controls Notch activity during neurogenesis. *Developmental biology* 281, 318-333.
26. Flores, M.V., Hall, C.J., Davidson, A.J., Singh, P.P., Mahagaonkar, A.A., Zon, L.I., Crosier, K.E., Crosier, P.S., 2008. Intestinal differentiation in zebrafish requires *Cdx1b*, a functional equivalent of mammalian *Cdx2*. *Gastroenterology* 135, 1665-1675.
27. Gaunt, S.J., Drage, D., Trubshaw, R.C., 2005. *cdx4/lacZ* and *cdx2/lacZ* protein gradients formed by decay during gastrulation in the mouse. *The International journal of developmental biology* 49, 901-908.
28. Gouti, M., Delile, J., Stamataki, D., Wymeersch, F.J., Huang, Y., Kleinjung, J., Wilson, V., Briscoe, J., 2017. A Gene Regulatory Network Balances Neural and Mesoderm Specification during Vertebrate Trunk Development. *Developmental cell* 41, 243-261.e247.
29. Gouti, M., Metzis, V., Briscoe, J., 2015. The route to spinal cord cell types: a tale of signals and switches. *Trends in genetics : TIG* 31, 282-289.
30. Hamburger, V., Hamilton, H.L., 1951. A series of normal stages in the development of the chick embryo. *Journal of morphology* 88, 49-92.
31. Han, K., Manley, J.L., 1993. Functional domains of the *Drosophila* Engrailed protein. *The EMBO journal* 12, 2723-2733.
32. Hayward, A.G., 2nd, Joshi, P., Skromne, I., 2015. Spatiotemporal analysis of zebrafish *hox* gene regulation by *Cdx4*. *Developmental dynamics : an official publication of the American Association of Anatomists* 244, 1564-1573.

33. Henrique, D., Abranches, E., Verrier, L., Storey, K.G., 2015. Neuromesodermal progenitors and the making of the spinal cord. *Development (Cambridge, England)* 142, 2864-2875.
34. Isaacs, H.V., Pownall, M.E., Slack, J.M., 1998. Regulation of Hox gene expression and posterior development by the *Xenopus* caudal homologue Xcad3. *The EMBO journal* 17, 3413-3427.
35. Itasaki, N., Bel-Vialar, S., Krumlauf, R., 1999. 'Shocking' developments in chick embryology: electroporation and in ovo gene expression. *Nature cell biology* 1, E203-207.
36. Karaz, S., Courgeon, M., Lepetit, H., Bruno, E., Pannone, R., Tarallo, A., Thouze, F., Kerner, P., Vervoort, M., Causeret, F., Pierani, A., D'Onofrio, G., 2016. Neuronal fate specification by the Dbx1 transcription factor is linked to the evolutionary acquisition of a novel functional domain. *EvoDevo* 7, 18.
37. Kumar, S., Duester, G., 2014. Retinoic acid controls body axis extension by directly repressing Fgf8 transcription. *Development (Cambridge, England)* 141, 2972-2977.
38. Lacomme, M., Liaubet, L., Pituello, F., Bel-Vialar, S., 2012. NEUROG2 drives cell cycle exit of neuronal precursors by specifically repressing a subset of cyclins acting at the G1 and S phases of the cell cycle. *Molecular and cellular biology* 32, 2596-2607.
39. Lee, K., Skromne, I., 2014. Retinoic acid regulates size, pattern and alignment of tissues at the head-trunk transition. *Development (Cambridge, England)* 141, 4375-4384.
40. Levine, M., Davidson, E.H., 2005. Gene regulatory networks for development. *Proceedings of the National Academy of Sciences of the United States of America* 102, 4936-4942.

41. Liu, C., Nakamura, E., Knezevic, V., Hunter, S., Thompson, K., Mackem, S., 2003. A role for the mesenchymal T-box gene *Brachyury* in AER formation during limb development. *Development (Cambridge, England)* 130, 1327-1337.
42. Liu, J.P., Laufer, E., Jessell, T.M., 2001. Assigning the positional identity of spinal motor neurons: rostrocaudal patterning of *Hox-c* expression by FGFs, *Gdf11*, and retinoids. *Neuron* 32, 997-1012.
43. Lohnes, D., 2003. The *Cdx1* homeodomain protein: an integrator of posterior signaling in the mouse. *BioEssays : news and reviews in molecular, cellular and developmental biology* 25, 971-980.
44. Longabaugh, W.J., Davidson, E.H., Bolouri, H., 2005. Computational representation of developmental genetic regulatory networks. *Developmental biology* 283, 1-16.
45. Marletaz, F., Maeso, I., Faas, L., Isaacs, H.V., Holland, P.W., 2015. *Cdx* ParaHox genes acquired distinct developmental roles after gene duplication in vertebrate evolution. *BMC biology* 13, 56.
46. Martin, B.L., Kimelman, D., 2012. Canonical Wnt signaling dynamically controls multiple stem cell fate decisions during vertebrate body formation. *Developmental cell* 22, 223-232.
47. Martinez-Morales, P.L., Diez del Corral, R., Olivera-Martinez, I., Quiroga, A.C., Das, R.M., Barbas, J.A., Storey, K.G., Morales, A.V., 2011. FGF and retinoic acid activity gradients control the timing of neural crest cell emigration in the trunk. *The Journal of cell biology* 194, 489-503.

48. Matsuda, T., Cepko, C.L., 2004. Electroporation and RNA interference in the rodent retina in vivo and in vitro. *Proceedings of the National Academy of Sciences of the United States of America* 101, 16-22.
49. Mazzoni, E.O., Mahony, S., Peljto, M., Patel, T., Thornton, S.R., McCuine, S., Reeder, C., Boyer, L.A., Young, R.A., Gifford, D.K., Wichterle, H., 2013. Saltatory remodeling of Hox chromatin in response to rostrocaudal patterning signals. *Nature neuroscience* 16, 1191-1198.
50. Megason, S.G., McMahon, A.P., 2002. A mitogen gradient of dorsal midline Wnts organizes growth in the CNS. *Development (Cambridge, England)* 129, 2087-2098.
51. Morales, A.V., de la Rosa, E.J., de Pablo, F., 1996. Expression of the cCdx-B homeobox gene in chick embryo suggests its participation in rostrocaudal axial patterning. *Developmental dynamics : an official publication of the American Association of Anatomists* 206, 343-353.
52. Nakamura, H., Funahashi, J., 2001. Introduction of DNA into chick embryos by in ovo electroporation. *Methods (San Diego, Calif.)* 24, 43-48.
53. Nordstrom, U., Maier, E., Jessell, T.M., Edlund, T., 2006. An early role for WNT signaling in specifying neural patterns of Cdx and Hox gene expression and motor neuron subtype identity. *PLoS biology* 4, e252.
54. Novitch, B.G., Chen, A.I., Jessell, T.M., 2001. Coordinate regulation of motor neuron subtype identity and pan-neuronal properties by the bHLH repressor Olig2. *Neuron* 31, 773-789.

55. Novitch, B.G., Wichterle, H., Jessell, T.M., Sockanathan, S., 2003. A requirement for retinoic acid-mediated transcriptional activation in ventral neural patterning and motor neuron specification. *Neuron* 40, 81-95.
56. Olivera-Martinez, I., Harada, H., Halley, P.A., Storey, K.G., 2012. Loss of FGF-dependent mesoderm identity and rise of endogenous retinoid signalling determine cessation of body axis elongation. *PLoS biology* 10, e1001415.
57. Olivera-Martinez, I., Storey, K.G., 2007. Wnt signals provide a timing mechanism for the FGF-retinoid differentiation switch during vertebrate body axis extension. *Development (Cambridge, England)* 134, 2125-2135.
58. Patel, N.S., Rhinn, M., Semprich, C.I., Halley, P.A., Dolle, P., Bickmore, W.A., Storey, K.G., 2013. FGF signalling regulates chromatin organisation during neural differentiation via mechanisms that can be uncoupled from transcription. *PLoS genetics* 9, e1003614.
59. Peter, I.S., Davidson, E.H., 2013. Chapter 11 - Transcriptional Network Logic: The Systems Biology of Development A2 - Dekker, A.J. Marian Walhout Marc Vidal Job, Handbook of Systems Biology. Academic Press, San Diego, pp. 211-228.
60. Pituello, F., Medevielle, F., Foulquier, F., Duprat, A.M., 1999. Activation of Pax6 depends on somitogenesis in the chick embryo cervical spinal cord. *Development (Cambridge, England)* 126, 587-596.
61. Royo, J.L., Maeso, I., Irimia, M., Gao, F., Peter, I.S., Lopes, C.S., D'Aniello, S., Casares, F., Davidson, E.H., Garcia-Fernandez, J., Gomez-Skarmeta, J.L., 2011. Transphyletic conservation of developmental regulatory state in animal evolution. *Proceedings of the National Academy of Sciences of the United States of America* 108, 14186-14191.



62. Sakai, Y., Meno, C., Fujii, H., Nishino, J., Shiratori, H., Saijoh, Y., Rossant, J., Hamada, H., 2001. The retinoic acid-inactivating enzyme CYP26 is essential for establishing an uneven distribution of retinoic acid along the antero-posterior axis within the mouse embryo. *Genes & development* 15, 213-225.
63. Sandmann, T., Girardot, C., Brehme, M., Tongprasit, W., Stolc, V., Furlong, E.E., 2007. A core transcriptional network for early mesoderm development in *Drosophila melanogaster*. *Genes & development* 21, 436-449.
64. Sansom, S.N., Griffiths, D.S., Faedo, A., Kleinjan, D.J., Ruan, Y., Smith, J., van Heyningen, V., Rubenstein, J.L., Livesey, F.J., 2009. The level of the transcription factor Pax6 is essential for controlling the balance between neural stem cell self-renewal and neurogenesis. *PLoS genetics* 5, e1000511.
65. Sasai, N., Kutejova, E., Briscoe, J., 2014. Integration of signals along orthogonal axes of the vertebrate neural tube controls progenitor competence and increases cell diversity. *PLoS biology* 12, e1001907.
66. Savory, J.G., Bouchard, N., Pierre, V., Rijli, F.M., De Repentigny, Y., Kothary, R., Lohnes, D., 2009. Cdx2 regulation of posterior development through non-Hox targets. *Development (Cambridge, England)* 136, 4099-4110.
67. Scardigli, R., Baumer, N., Gruss, P., Guillemot, F., Le Roux, I., 2003. Direct and concentration-dependent regulation of the proneural gene Neurogenin2 by Pax6. *Development (Cambridge, England)* 130, 3269-3281.
68. Schneider, C.A., Rasband, W.S., Eliceiri, K.W., 2012. NIH Image to ImageJ: 25 years of image analysis. *Nature methods* 9, 671-675.

69. Shimizu, T., Bae, Y.K., Hibi, M., 2006. Cdx-Hox code controls competence for responding to Fgfs and retinoic acid in zebrafish neural tissue. *Development (Cambridge, England)* 133, 4709-4719.
70. Shimojo, H., Ohtsuka, T., Kageyama, R., 2008. Oscillations in notch signaling regulate maintenance of neural progenitors. *Neuron* 58, 52-64.
71. Shu, J., Fu, H., Qiu, G., Kaye, P., Ilyas, M., 2013. Segmenting overlapping cell nuclei in digital histopathology images. *Conference proceedings IEEE Engineering in Medicine and Biology Society. Annual Conference 2013*, 5445-5448.
72. Skaggs, K., Martin, D.M., Novitch, B.G., 2011. Regulation of spinal interneuron development by the Olig-related protein Bhlhb5 and Notch signaling. *Development (Cambridge, England)* 138, 3199-3211.
73. Skromne, I., Thorsen, D., Hale, M., Prince, V.E., Ho, R.K., 2007. Repression of the hindbrain developmental program by Cdx factors is required for the specification of the vertebrate spinal cord. *Development (Cambridge, England)* 134, 2147-2158.
74. Sritanaudomchai, H., Sparman, M., Tachibana, M., Clepper, L., Woodward, J., Gokhale, S., Wolf, D., Hennebold, J., Hurlbut, W., Grompe, M., Mitalipov, S., 2009. CDX2 in the formation of the trophoctoderm lineage in primate embryos. *Developmental biology* 335, 179-187.
75. Strumpf, D., Mao, C.A., Yamanaka, Y., Ralston, A., Chawengsaksophak, K., Beck, F., Rossant, J., 2005. Cdx2 is required for correct cell fate specification and differentiation of trophoctoderm in the mouse blastocyst. *Development (Cambridge, England)* 132, 2093-2102.

76. Tamashiro, D.A., Alarcon, V.B., Marikawa, Y., 2012. Nkx1-2 is a transcriptional repressor and is essential for the activation of Brachyury in P19 mouse embryonal carcinoma cell. *Differentiation; research in biological diversity* 83, 282-292.
77. Tzouanacou, E., Wegener, A., Wymeersch, F.J., Wilson, V., Nicolas, J.F., 2009. Redefining the progression of lineage segregations during mammalian embryogenesis by clonal analysis. *Developmental cell* 17, 365-376.
78. van den Akker, E., Forlani, S., Chawengsaksophak, K., de Graaff, W., Beck, F., Meyer, B.I., Deschamps, J., 2002. Cdx1 and Cdx2 have overlapping functions in anteroposterior patterning and posterior axis elongation. *Development (Cambridge, England)* 129, 2181-2193.
79. van Rooijen, C., Simmini, S., Bialecka, M., Neijts, R., van de Ven, C., Beck, F., Deschamps, J., 2012. Evolutionarily conserved requirement of Cdx for post-occipital tissue emergence. *Development (Cambridge, England)* 139, 2576-2583.
80. Verzi, M.P., Hatzis, P., Sulahian, R., Philips, J., Schuijers, J., Shin, H., Freed, E., Lynch, J.P., Dang, D.T., Brown, M., Clevers, H., Liu, X.S., Shivdasani, R.A., 2010. TCF4 and CDX2, major transcription factors for intestinal function, converge on the same cis-regulatory regions. *Proceedings of the National Academy of Sciences of the United States of America* 107, 15157-15162.
81. Wang, Y., Yabuuchi, A., McKinney-Freeman, S., Ducharme, D.M., Ray, M.K., Chawengsaksophak, K., Archer, T.K., Daley, G.Q., 2008. Cdx gene deficiency compromises embryonic hematopoiesis in the mouse. *Proceedings of the National Academy of Sciences of the United States of America* 105, 7756-7761.

82. White, R.J., Nie, Q., Lander, A.D., Schilling, T.F., 2007. Complex regulation of *cyp26a1* creates a robust retinoic acid gradient in the zebrafish embryo. *PLoS biology* 5, e304.
83. Wilkinson, D.G., Nieto, M.A., 1993. Detection of messenger RNA by in situ hybridization to tissue sections and whole mounts. *Methods in enzymology* 225, 361-373.
84. Wilson, V., Olivera-Martinez, I., Storey, K.G., 2009. Stem cells, signals and vertebrate body axis extension. *Development (Cambridge, England)* 136, 1591-1604.
85. Yamaguchi, T.P., Takada, S., Yoshikawa, Y., Wu, N., McMahon, A.P., 1999. T (Brachyury) is a direct target of Wnt3a during paraxial mesoderm specification. *Genes & development* 13, 3185-3190.

Figure 1

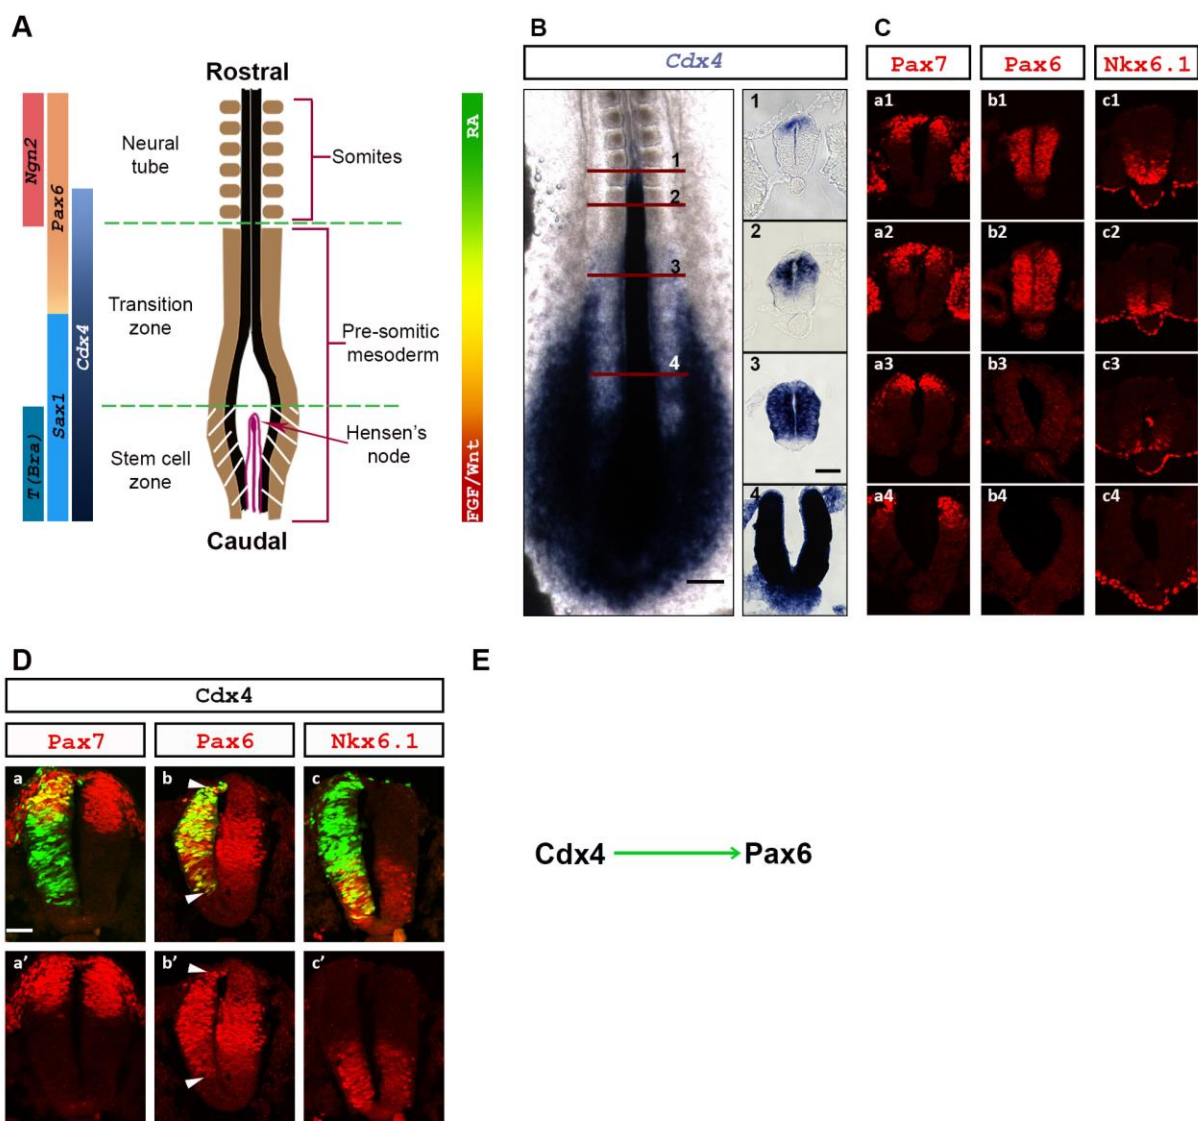

Figure 2

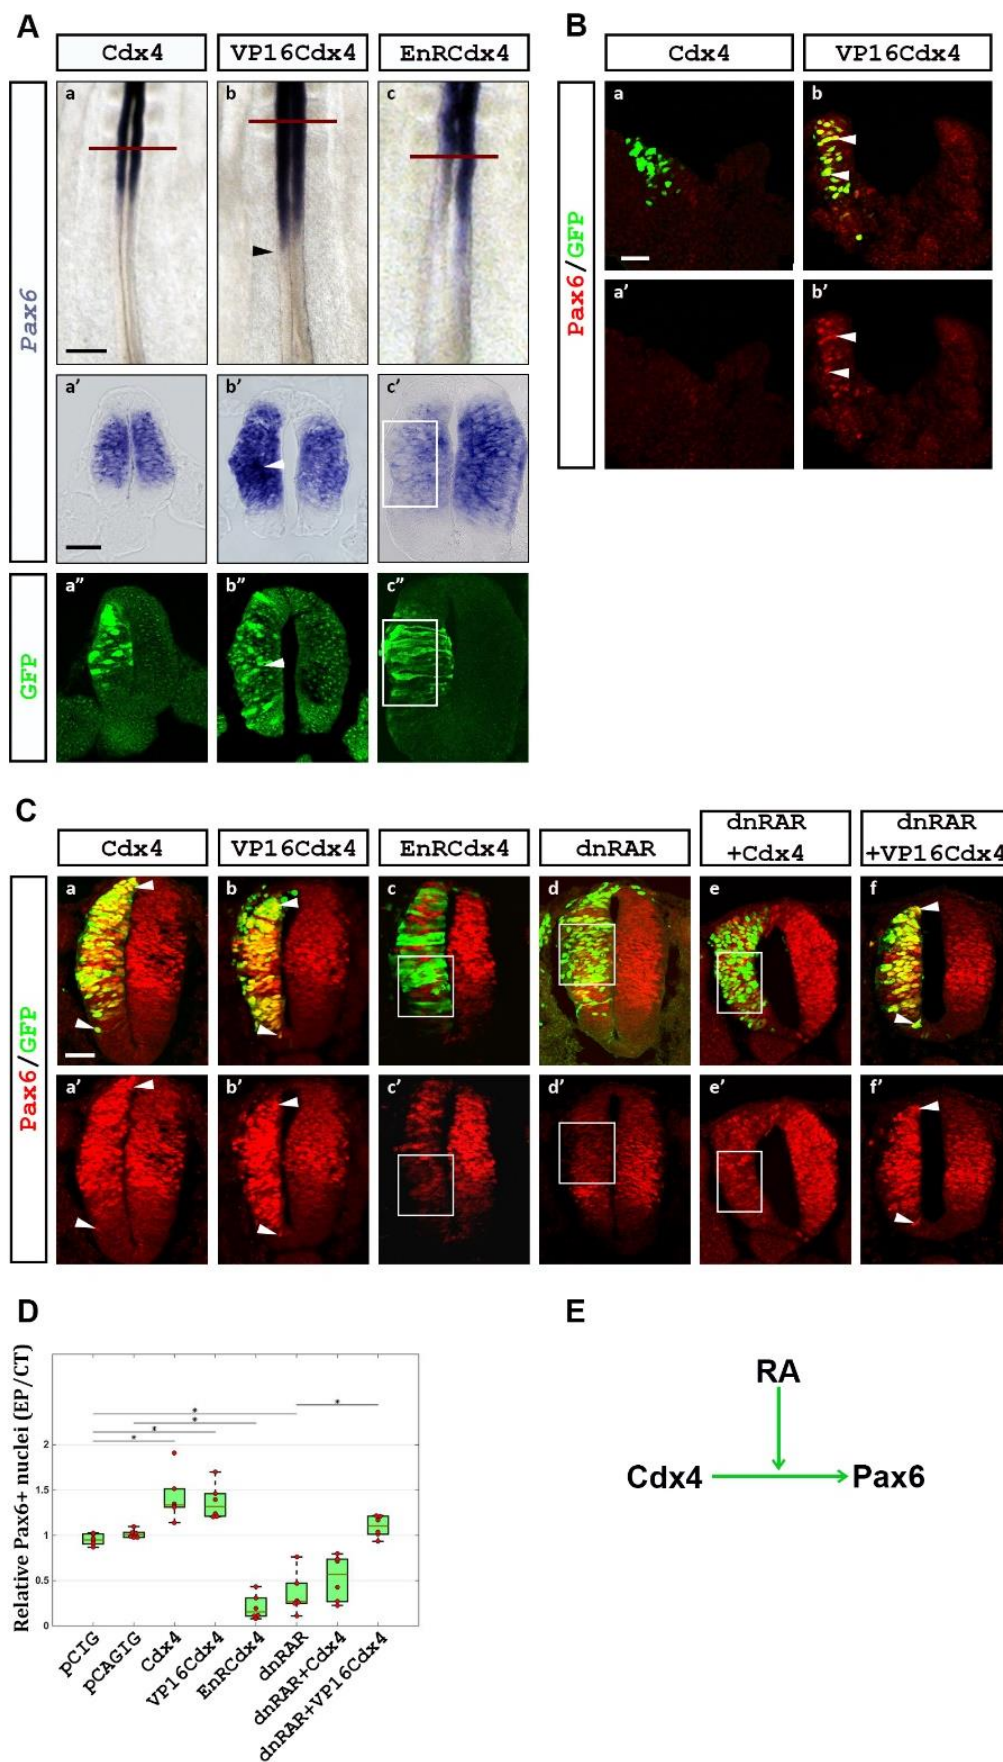



Figure 3

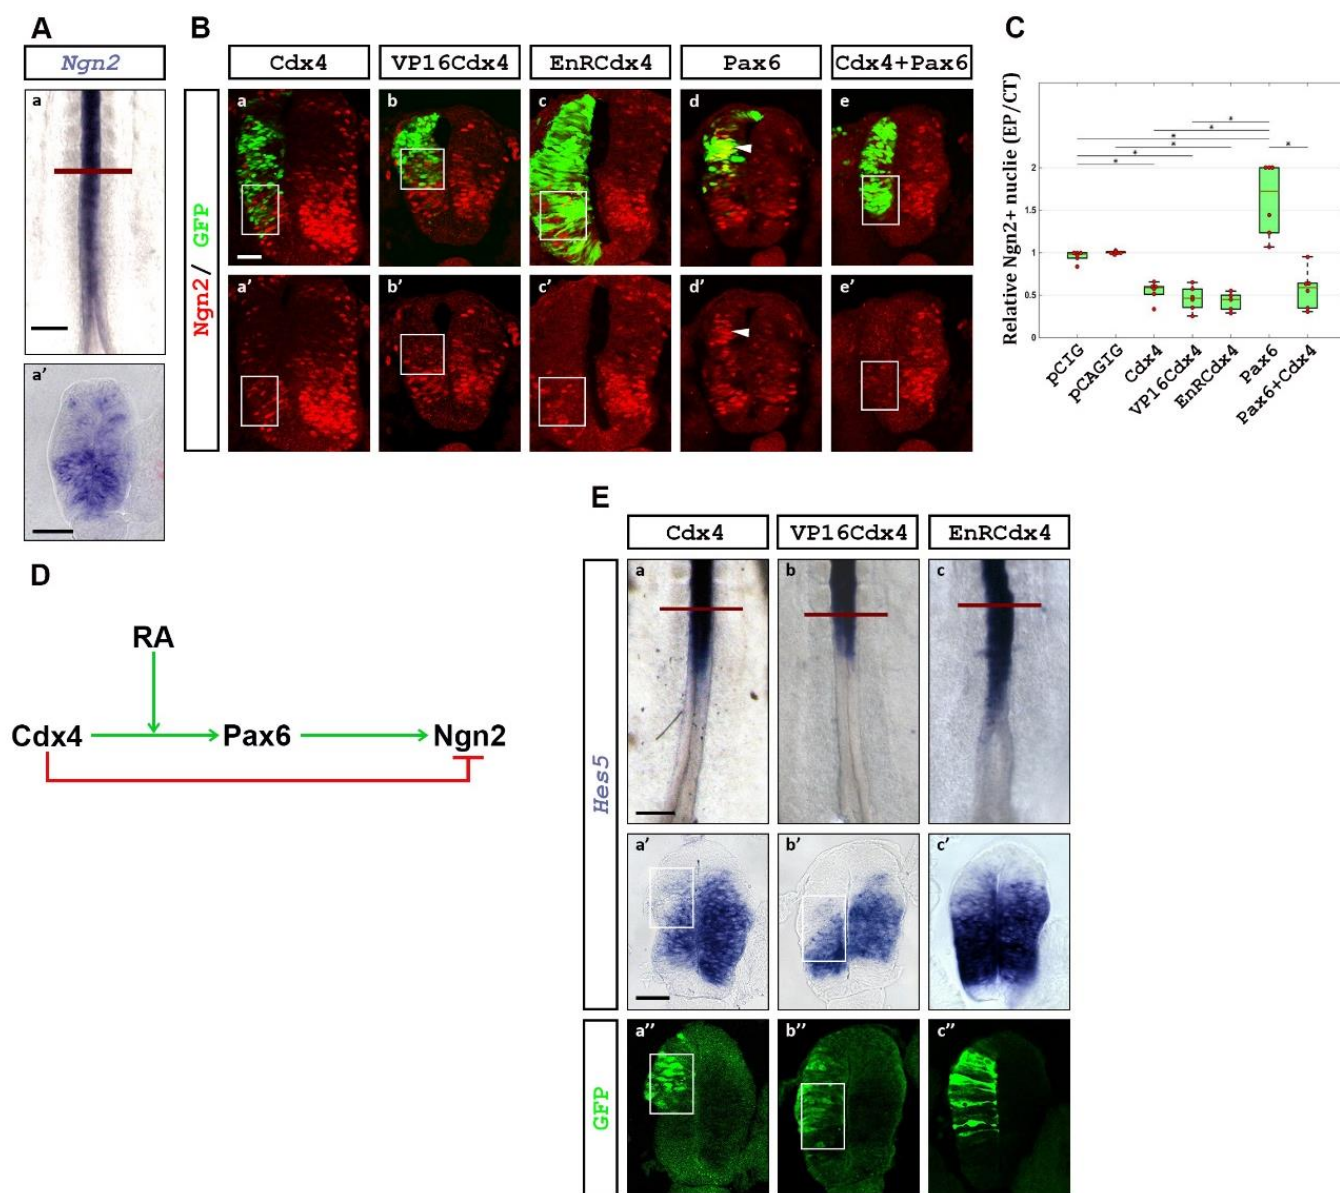

Figure 4

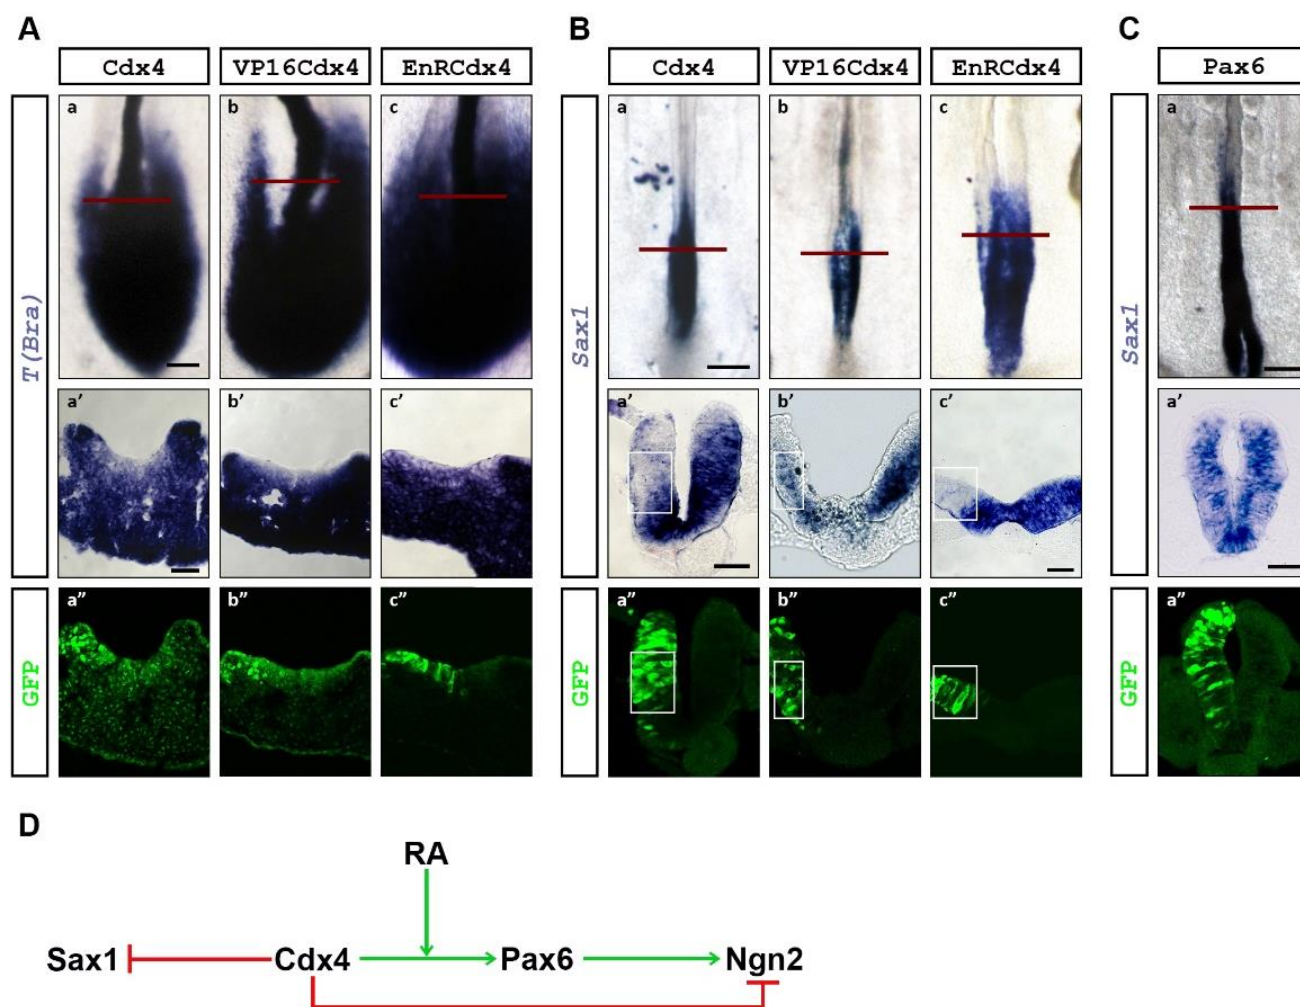



Figure 5

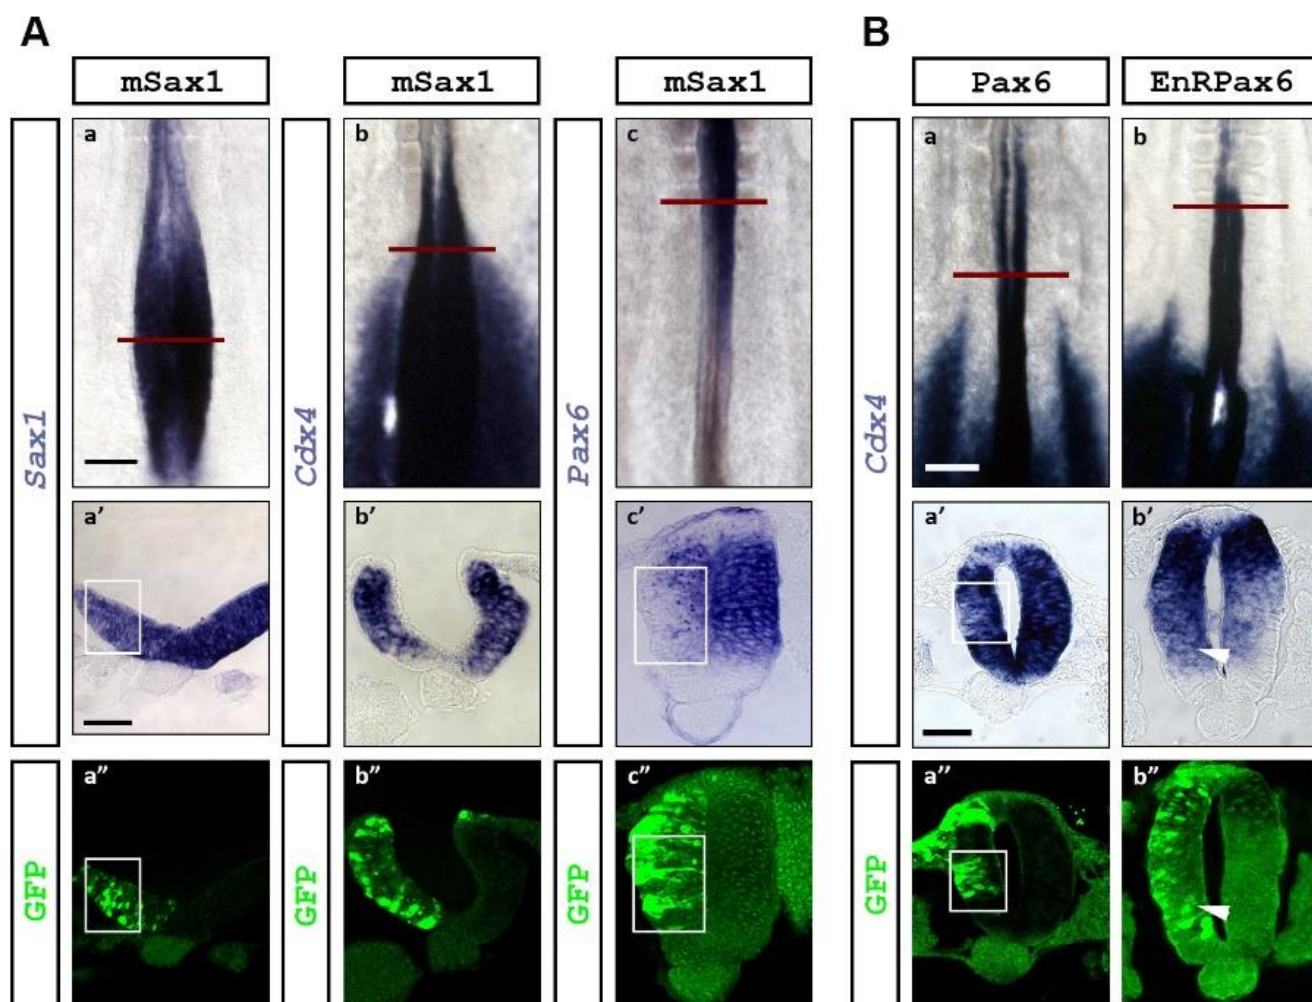

**C**

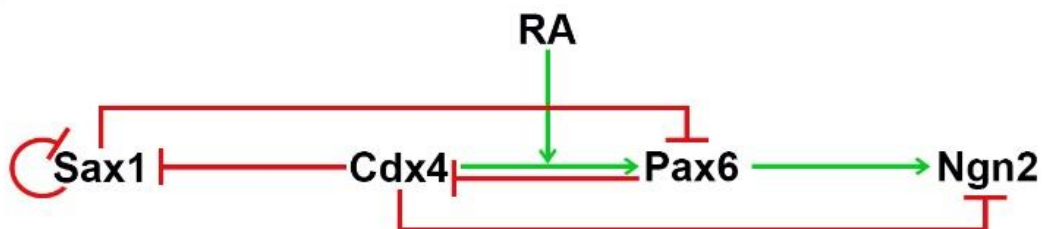

Figure 6

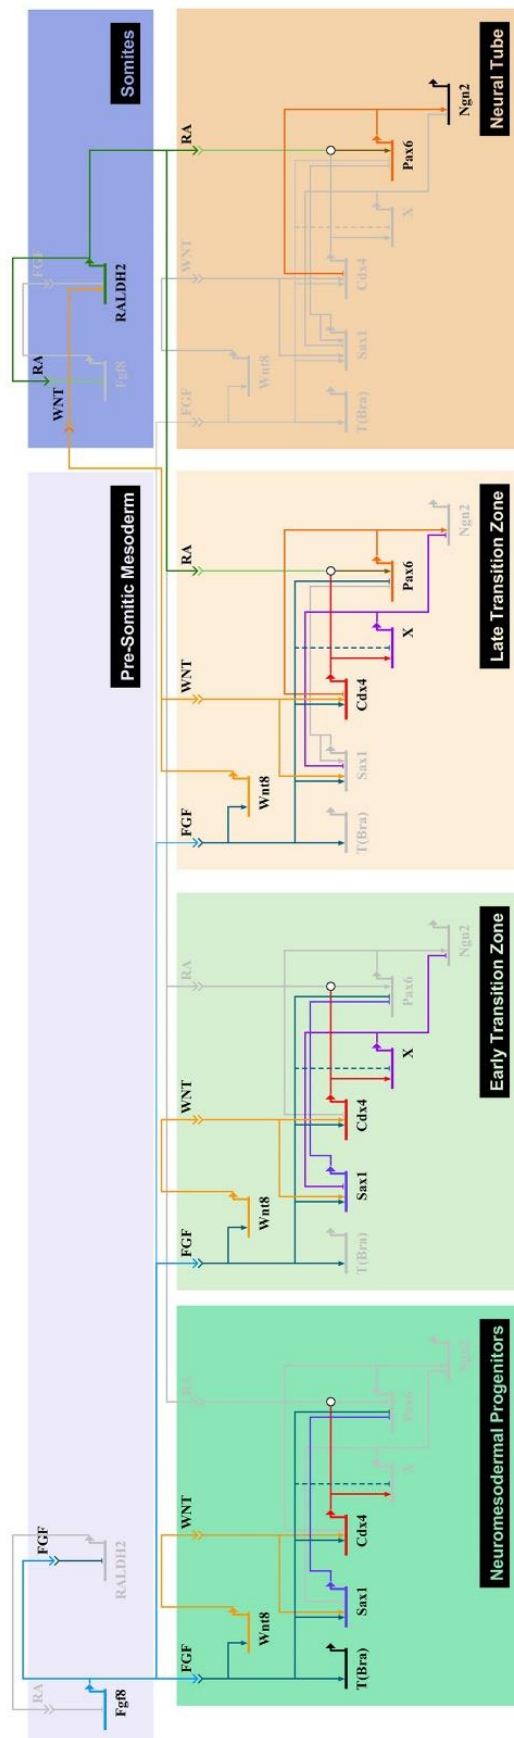

Source: https://www.biorxiv.org/content/10.1101/177469v2.full.pdf
